# Supplementary material for: OER highly active encapsulants to improve the electrochemical anticorrosion of Fe–N–C for ultralong-lifespan and high-rate rechargeable zinc–air batteries
Source: Royal Society of Chemistry journal article supplement (doi:10.1039/d3ey00160a), 2023-01-01
Supplement: d3ey00160a7.pdf [file d3ey00160a7.pdf]

# Supporting Information

1

2

3 **OER-Highly-Active Encapsulant to Improve the**  
4 **Electrochemical Anticorrosion of Fe-N-C for Ultralong-**  
5 **Lifespan and High-Rate Rechargeable Zinc-Air Batteries**

6 Jiale Li,<sup>a</sup> Niu Huang,<sup>a,\*</sup> Minghui Lv,<sup>a</sup> Na Su,<sup>c</sup> Chao Li,<sup>a</sup> Yingping Huang,<sup>a</sup>  
7 Yongye Wang,<sup>a</sup> Yong Zheng,<sup>a</sup> Wei Liu,<sup>a</sup> Tianyi Ma,<sup>b,\*</sup> Liqun Ye<sup>a,\*</sup>

8

9 \* Corresponding author's E-mail addresses: huangliu.ysxf@163.com;

10 tianyi.ma@rmit.edu.au; lqye@ctgu.edu.cn.

11

12 <sup>a</sup> *College of Materials and Chemical Engineering, Key Laboratory of Inorganic*  
13 *Nonmetallic Crystalline and Energy Conversion Materials, China Three Gorges*  
14 *University, Yichang 443002, China.*

15 <sup>b</sup> *School of Science, RMIT University, Melbourne, VIC 3000, Australia.*

16 <sup>c</sup> *School of New Energy and Materials, Southwest Petroleum University, Chengdu*  
17 *610500, China.*

## 18 **Experimental Section**

### 19 ✧ **Materials**

20 Ferrous citrate ( $C_6H_8FeO_7$ ), nickel chloride hexahydrate ( $NiCl_2 \cdot 6H_2O$ ), urea,  
21 dopamine hydrochloride (DA), dicyandiamide (DCA), hexadecyl trimethyl ammonium  
22 bromide (CTAB), terephthalic acid (PTA), 20% Pt/C (Sigma-Aldrich No. 738549) and  
23 Nafion<sup>®</sup>117 solution (5%, Sigma-Aldrich) are analytically pure. Hydrogen peroxide  
24 ( $H_2O_2$ , 35 wt.%) was purchased from Thermo Fisher Scientific. Horseradish peroxidase  
25 (HRP) was purchased from Shanghai Aladdin Bio-Chem Technology Co., Ltd. HRP  
26 was a lyophilized powder, with a purity of RZ: >2.5 and activity: >200 units/mg.  
27 Carbon cloth (CC, HCP330N) was produced in Shanghai Hesen Electric Co., Ltd. The  
28 carbon cloths were treated with piranha water for 24 h to enhance their hydrophilization.  
29 Piranha water was made of concentrated sulfuric acid and hydrogen peroxide with a  
30 volume ratio of 7:3. Deionized water (DI, 18.25 M $\Omega$ ) was obtained from a Millipore  
31 Milli-Q water purification system.

32

### 33 ✧ **Catalyst Syntheses**

#### 34 **1. Syntheses of Fe-NCNT**

35 Fe-NCNT@NiFe-LDH was prepared by a chemical bath deposition (CBD) method  
36 and a chemical vapor deposition (CVD) method. First,  $C_6H_8FeO_7$  of 0.7378 g and urea  
37 of 2.667 g were dissolved in 40 mL DI water. Then, the mixed liquid was placed in  
38 cuvette with a piece of CC immersed into, which was kept at 95°C for 3 h. After that,  
39 the CC piece with Fe-precursor grown on was clipped out, washed by DI water for

40 several times, and dried for use. Second, DA of 0.4 mg/mL was dissolved in Tris  
41 solution (pH = 8.5). Then, the above CC piece was soaked in the homogeneous solution  
42 at room temperature for 24 h. After that, polydopamine (PDA) was coated on the Fe-  
43 precursor. Third, the Fe-NCNT catalyst was prepared by a CVD method. That is, the  
44 above CC/Fe-precursor@PDA as a catalyst for catalyzing the growth of NCNTs was  
45 put in the middle of a quartz tube, DCA of 1 g served as solid source was put near the  
46 inlet port, and the reaction was processed at 350°C for 1 h and then heated up to 900°C  
47 for 2 h with Ar as the carrier gas.

## 48 **2. Synthesis of NiFe-LDH**

49 NiCl<sub>2</sub>·6H<sub>2</sub>O of 0.71307 g, C<sub>6</sub>H<sub>8</sub>FeO<sub>7</sub> of 0.2459 g, urea of 2.667 g, and CTAB of  
50 0.7289 g were dissolved in 40 mL DI water. Then, the mixed liquid was placed in  
51 cuvette with a piece of CC immersed into, which was kept at 95°C for 3 h. After that,  
52 NiFe-LDH was grown on the CC substrate.

## 53 **3. Syntheses of Fe-NCNT@NiFe-LDH**

54 NiCl<sub>2</sub>·6H<sub>2</sub>O of 0.71307 g, C<sub>6</sub>H<sub>8</sub>FeO<sub>7</sub> of 0.2459 g, urea of 2.667 g, and CTAB of  
55 0.7289 g were dissolved in 40 mL DI water. Then, the mixed liquid was placed in  
56 cuvette with Fe-NCNT immersed into, which was kept at 95°C for 3 h. After that, NiFe-  
57 LDH was grown on the NCNTs of the Fe-NCNT, integrated as Fe-NCNT@NiFe-LDH.

58

## 59 **✧ Material Characterization**

60 X-ray powder diffraction (XRD) was performed on a Rigaku Ultima IV  
61 diffractometer with an X-ray generator power of 3 KW (Cu-K<sub>α</sub> radiation). The

62 microstructures and morphologies of catalysts were characterized by field-emission  
 63 scanning electron microscope (FESEM, JEOL, JSM-7500F) and transmission electron  
 64 microscopy (TEM, FEI JEOL-2100F). The compositions and element states of catalysts  
 65 were measured by X-ray photoelectron spectroscopy (XPS, Escalab 250Xi X-ray,  
 66 Thermo Scientific).

67

## 68 ✧ **Reaction Mechanism**

### 69 **1. 4-electron oxygen reduction reaction (ORR)**

70 It is widely acknowledged that ORR could be carried out via a 4-electron transfer  
 71 pathway in alkaline solution. The detailed steps are as follows:

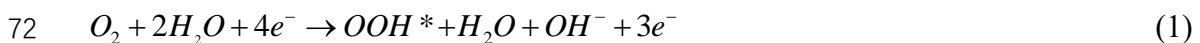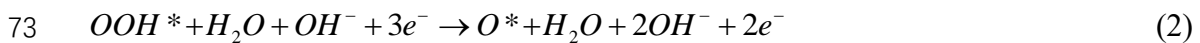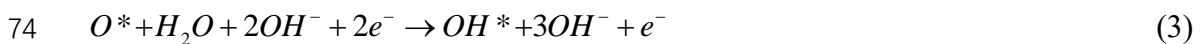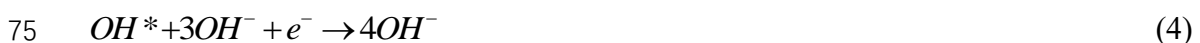

76 where \* represents on surface active sites.

77 Alternatively, ORR could be carried out via another 4-electron transfer pathway in  
 78 alkaline solution via 2-electron transfer process from  $O_2$  to  $H_2O_2$  plus 2-electron  
 79 transfer process from  $H_2O_2$  to  $OH^-$ . The detailed steps are as follows:

### 80 **2-electron transfer process from $O_2$ to $H_2O_2$**

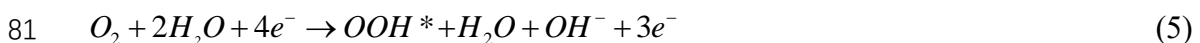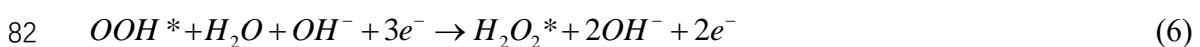

### 83 **2-electron transfer process from $H_2O_2$ to $OH^-$**

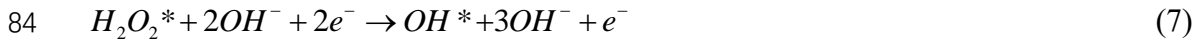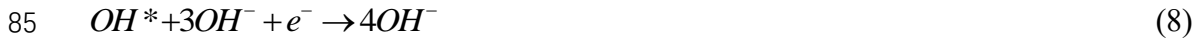

86 Notably,  $H_2O_2^*$  represents the hydrogen peroxide molecule is adsorbed on catalyst  
 87 surface. Here  $H_2O_2$  acts as an ORR mediator. Intermediate  $H_2O_2$  may pose threats  
 88 to Fe-N-C catalyst structure via corrosion through Fenton and Fenton-like reactions.

89 **2. Generation of hydrogen peroxide**

90 The ORR reaction also could be carried out via a 2-electron transfer process, which  
 91 is accompanied by the production of  $H_2O_2$  in alkaline solution. The reaction steps are  
 92 suggested below:

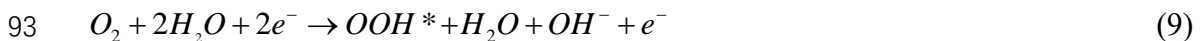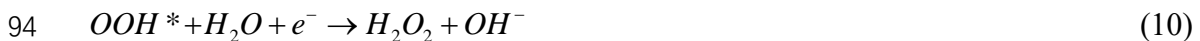

95 Notably,  $H_2O_2$  represents the hydrogen peroxide molecule is dissolved into aqueous  
 96 electrolyte. Here  $H_2O_2$  acts as the ORR byproduct. Generation of byproduct  $H_2O_2$   
 97 means lower current density, which will in turn cut down the output power density of  
 98 the Zn-air battery in discharging process. Besides,  $H_2O_2$  is detrimental to Fe-N-C  
 99 catalyst stability.

100 **3. Decomposition of byproduct  $H_2O_2$  involving  $\bullet OH$  radicals<sup>1,2</sup>**

101  $H_2O_2$  could be decomposed to  $\bullet OH$  radicals under some surroundings through Fenton  
 102 or Fenton-like reactions. The Fenton reactions occur as follows:

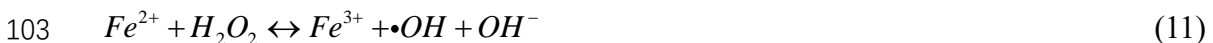

104 The reduction of  $Fe^{3+}$  is achieved as follows:

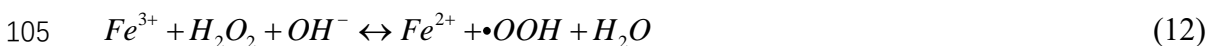

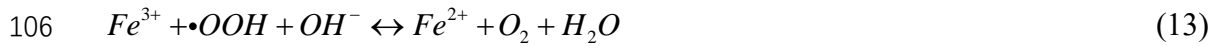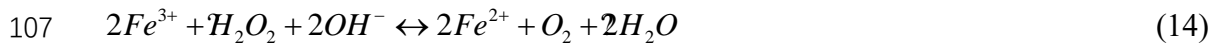

108 •OH radicals as a highly reactive oxygen group can damage durability via two pathways,  
109 one involves the conversion of the carbon substrate to CO<sub>2</sub>, resulting in the stripping of  
110 the metal active center, another is the establishment of oxygen functional groups within  
111 the catalyst, which will critically reduce the catalytic performance of the catalyst.

#### 112 **4. Consumption of byproduct H<sub>2</sub>O<sub>2</sub> without radicals<sup>3</sup>**

113 To eliminate the effect of •OH radicals on the stability of the catalyst, H<sub>2</sub>O<sub>2</sub> could be  
114 consumed via electrochemical pathways. There are two types of electrochemical  
115 reaction pathways that are peroxide reduction reaction (PRR) and peroxide oxidation  
116 reaction (POR) with the following equations:

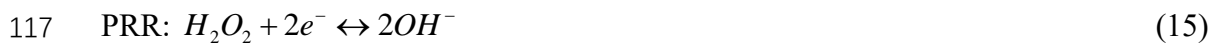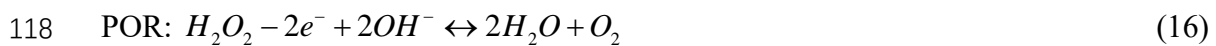

119 In addition, H<sub>2</sub>O<sub>2</sub> could be consumed via an important non-electrochemical pathway,  
120 that is disproportionation with the following equation:<sup>4</sup>

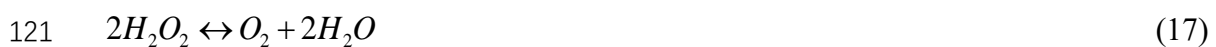

122

### 123 ✧ **Measurements**

#### 124 **1. Electrochemical tests on electrodes**

125 Electrochemical measurements were performed via electrochemical workstations  
126 (CHI760E, Chenhua shanghai). Except specifically stated, all linear voltammetry  
127 curves (LSV) were corrected via a scan rate of 5 mV s<sup>-1</sup> and with 95%-iR compensation

128 in a three-electrode system, which comprises of a counter electrode (carbon rod), a  
129 reference electrode (Hg/HgO electrode), and a working electrode. Electrochemical  
130 impedance spectroscopy (EIS) was carried out between 0.01 Hz and 100 kHz (AC  
131 voltage with 5 mV). The electrochemical active surface area (ECSA) of the catalysts  
132 were determined by calculating its bilayer capacitance ( $C_{dl}$ ). The  $C_{dl}$  value was obtained  
133 via CV curves measured in non-Faradic potential ranges with different scan rates. The  
134 calculation formula was as  $C_{dl} = \Delta j / 2\nu$ , where  $\Delta j$  is defined as the difference between  
135 the current densities at the middle potential of each curves and  $\nu$  corresponds to scan  
136 rates.

## 137 **2. Gas diffusion electrode (GDE) test**

138 The ORR activities of Fe-NCNT@NiFe-LDH, Fe-NCNT, NiFe-LDH, and Pt/C were  
139 tested via a gas diffusion electrode (GDE), which supports an advanced three-phase  
140 (gas-liquid-solid) interface on the catalyst surface.<sup>5-7</sup> Because of the low saturated O<sub>2</sub>  
141 concentration in aqueous electrolyte, the mass transport limitation widely exists in LSV,  
142 rotating disk electrode (RDE), and rotating ring disk electrode (RRDE) tests. However,  
143 through the design on gas flow, the mass transport limitation could be well avoided to  
144 achieve larger ORR current density.

145 The GDE test as well employed the three-electrode test system, with the catalyst as  
146 working electrode, the carbon rod as counter electrode, and Hg/HgO electrode as  
147 reference electrode, with the 1M KOH aqueous electrolyte saturated by O<sub>2</sub>. The  
148 structure of GDE is schematically shown in Figure S10.

149 The method to make the catalyst-loaded working electrode was as follows. Fe-

150 NCNT@NiFe-LDH, Fe-NCNT, and NiFe-LDH of 1 cm<sup>2</sup> geometric area (They are in-  
151 situ grown on CC) were respectively ground to fine powder in an agate mortar and to  
152 prepare slurry by adding drops of anhydrous ethanol and 30 μL of Nafion (for each  
153 catalyst). The slurry was then uniformly dropped on a piece of hydrophobic carbon  
154 cloth with the catalyst centered at an area of 1 cm<sup>2</sup>, and then dried at 60°C in air. For  
155 Pt/C, commercial 20% Pt/C of 5 mg and carbon cloth of 1 cm<sup>2</sup> (~ 10 mg) were used to  
156 prepare slurry, and otherwise synthetic conditions were identical.

### 157 **3. Rotating ring disc electrode (RRDE) and rotating disc electrode (RDE) tests**

#### 158 **ORR performance**

159 To evaluate the ORR performances of catalysts in O<sub>2</sub>-saturated 0.1 M KOH, RRDE  
160 (ALS, RRDE-3A) was carried out using the rotation speed of 1600 rpm. Fe-  
161 NCNT@NiFe-LDH, Fe-NCNT, NiFe-LDH, and Pt/C based slurries were respectively  
162 prepared via the same operations as used in GDE measurement. Each kind of slurry was  
163 carefully transformed onto the glassy carbon disc electrode of the RRDE. After drying  
164 at room temperature and in air, a uniform and dense film should be guaranteed on the  
165 surface of the disc electrode.

166 Electron transfer number (*n*) and hydrogen peroxide yield (H<sub>2</sub>O<sub>2</sub>%) were calculated  
167 according to the following two formulas:

$$168 \quad n = 4 \times \frac{I_D}{I_D + \frac{I_R}{N}} \quad (18)$$

$$169 \quad H_2O_2\% = 200 \times \frac{\frac{I_R}{N}}{\frac{I_R}{N} + I_D} \quad (19)$$

170 where *I<sub>R</sub>* and *I<sub>D</sub>* were the ring and disk currents, *N* was the ring electrode collection



171 efficiency and was 0.4 here.

### 172 Peroxidase-coupled RRDE

173 To investigate the specific pathway of electron transfer, horseradish peroxidase was  
174 introduced to (partially) terminate the “2+2”-electron transfer pathway of ORR by  
175 capturing H<sub>2</sub>O<sub>2</sub>. The test conditions and electrode preparation were the same as for the  
176 RRDE test, except with 0.02 mg/mL horseradish peroxidase added into the O<sub>2</sub>-saturated  
177 0.1 M KOH aqueous electrolyte. HRP is a natural metalloenzyme extracted from the  
178 roots of the horseradish plant. HRP reacts with H<sub>2</sub>O<sub>2</sub> to form compound I with a reaction  
179 rate coefficient of 1\*10<sup>7</sup> M<sup>-1</sup>s<sup>-1</sup>.<sup>8</sup> The capture mechanism of horseradish peroxidase on  
180 H<sub>2</sub>O<sub>2</sub> is as follows.<sup>9</sup>

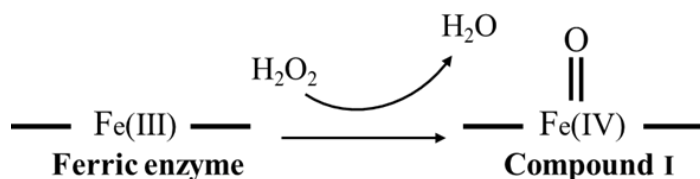

(20)

### 183 PRR and POR by RDE

184 The test conditions and electrode preparations were the same as for the RRDE test,  
185 except that 10 mM H<sub>2</sub>O<sub>2</sub> was introduced and the electrolyte solution was saturated by  
186 N<sub>2</sub> in the tests. LSV curves for PRR performances were collected in the range from 1.0  
187 V to 0.3 V vs RHE (in the negative potential direction), and LSV curves for POR  
188 performances were collected in the range from 0.9 V to 1.7 V vs RHE (in the positive  
189 potential direction).

190

191 **4. Fluorescence test**

192 Detection on  $\bullet\text{OH}$  radical<sup>10-12</sup> was performed by using a fluorescence  
193 spectrophotometer (SHIMADZU, RF-6000A) with the excitation wavelength of 315  
194 nm, the excitation bandwidth of 1.5 nm, and the wavelength range of 300 nm to 500  
195 nm.

196 To probe if  $\bullet\text{OH}$  radical could be generated without  $\text{H}_2\text{O}_2$ , the catalyst samples (Fe-  
197 NCNT@NiFe-LDH, Fe-NCNT, and NiFe-LDH) with 1  $\text{cm}^2$  geometric area were  
198 immersed into a solution of 20 mL consisting of 0.1 M KOH and 0.08 mg/mL PTA,  
199 respectively. After holding at 30 °C for 24 h, 3 mL solution was extracted out for  
200 fluorescence test. The corresponding result is shown in Figure 5g in the main body,  
201 where the sample marked “blank sample” represents no catalyst is introduced into the  
202 solution while other conditions are identical.

203 To probe if  $\bullet\text{OH}$  radical was generated through Fenton reactions in ZABs, the catalyst  
204 samples with 1  $\text{cm}^2$  geometric area were immersed into a solution of 20 mL consisting  
205 of 0.1 M KOH and 0.08 mg/mL PTA, respectively. After ORR reaction at a constant  
206 potential of 0.5 V vs RHE for 3 h, 3 mL solution was extracted out for fluorescence test.  
207 The corresponding result is shown in Figure 5h in the main body.

208 Furthermore, to resemble byproduct  $\text{H}_2\text{O}_2$  in high concentration, the catalyst samples  
209 with 1  $\text{cm}^2$  geometric area were immersed into a solution of 20 mL consisting of 0.1 M  
210 KOH, 0.08 mg/mL PTA and 10 mM  $\text{H}_2\text{O}_2$ , respectively. After holding at 30 °C for 24  
211 h, 3 mL solution was extracted out for fluorescence test. The corresponding result is  
212 shown in Figure 5i in the main body, where the sample marked “blank sample”

213 represents no catalyst is introduced into the solution while other conditions are identical.

214 If there are  $\bullet\text{OH}$  radicals, they will capture fast by PTA through the reaction as  
215 follows:

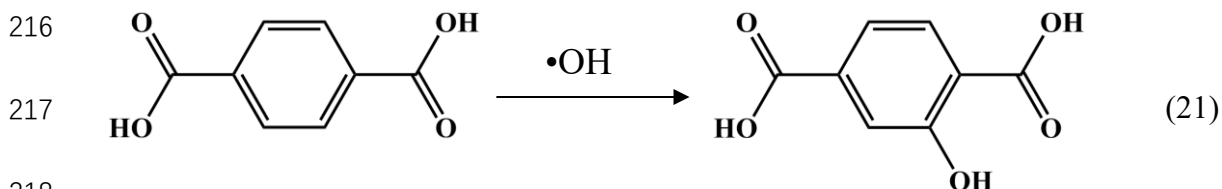

219 The generated 2-Hydroxy terephthalic acid has a fluorescent effect with the emission  
220 wavelength of  $\sim 425$  nm.

## 221 5. $\text{H}_2\text{O}_2$ detection methods.

222 A phosphate buffer was prepared by dissolving 2.8756 g  $\text{K}_2\text{HPO}_4 \cdot 3\text{H}_2\text{O}$  and 11.935 g  
223  $\text{KH}_2\text{PO}_4$  in 200 ml deionized water. Then prepared N, N-diethyl-1,4-phenylenediamine  
224 sulfate (DPD, 97%, Aldrich) and peroxidase (POD, horseradish, Aldrich) stock  
225 solutions. (Dissolve 0.1 g DPD in 10 ml 0.05 M  $\text{H}_2\text{SO}_4$  solution and 10 mg POD in 10  
226 ml deionized water.) During the experiment, take 2.5ml sample solution into a quartz  
227 tube each time, added 0.4 ml phosphate buffer and 50  $\mu\text{L}$  POD solution in sequence.  
228 Liter and 50 microliters of DPD solution, mix well. Useing UV-2600 (Shanghai  
229 Tianmei Scientific Instrument Co., Ltd.) to measure absorbance at 552 nm. Calibrate  
230 the  $\text{H}_2\text{O}_2$  concentration by diluting a 30%  $\text{H}_2\text{O}_2$  stock solution.<sup>13</sup>

## 231 6. Off-line gas chromatography test

232 DI water of 4 mL were added to the bottom of a quartz reactor with the volume of  
233 250 mL (PQ256, purchased from Beijing Perfect light Technology Co., Ltd., China).  
234 Fe-NCNT@NiFe-LDH and Fe-NCNT were then respectively immersed into the DI

235 water. And then, the reactor is sealed, and Ar gas was continuously introduced into the  
236 reactor for half an hour to remove the original oxygen from the system. After that, 50  
237  $\mu\text{L}$   $\text{H}_2\text{O}_2$  (35 wt.%) was added into the DI water, and simultaneously timing was begun.  
238 At 5, 9, 13, 17, 21, 25, and 29 min, 1 mL gas was extracted from the system at each  
239 time and used for analysis via gas chromatographs (GC9790II, FULI INSTRUMENTS).

## 240 **7. Aqueous Zn-air battery (ZAB) assembly and performance measurements**

241 CC/catalysts of  $1\text{ cm}^2$  geometric area were sandwiched by two pieces of nickel foam.  
242 And to enhance air diffusion, an air diffusion layer was made on the outward side of  
243 the air cathodes. The detail is as follows. A viscous slurry was prepared by adequately  
244 mixing 0.9 g carbon black, 3 mL isopropanol and 0.1 mL PTFE (10 wt% in DI water).  
245 Then, the slurry was applied evenly to one side of the sandwich (that is the outside of  
246 one piece of nickel foam) until every cavity was filled. And then the above sandwich  
247 was compressed tightly by using an even pressure of 3 MPa for 2 min. Finally, the  
248 excess slurry on the surface was scraped off by using a plastic or stainless-steel blade.  
249 The above electrodes were used as the air cathode, polished zinc foil was used as the  
250 anode, and a mixture of 6.0 M KOH + 0.2 M  $\text{Zn}(\text{CH}_3\text{COO})_2$  was used as the electrolyte.  
251 The structure of the assembled ZABs is schematically shown in Figure 6a in the main  
252 body.

253 All ZABs were measured in air conditions without pumping oxygen.

254

255

256 **Figures and Discussion**

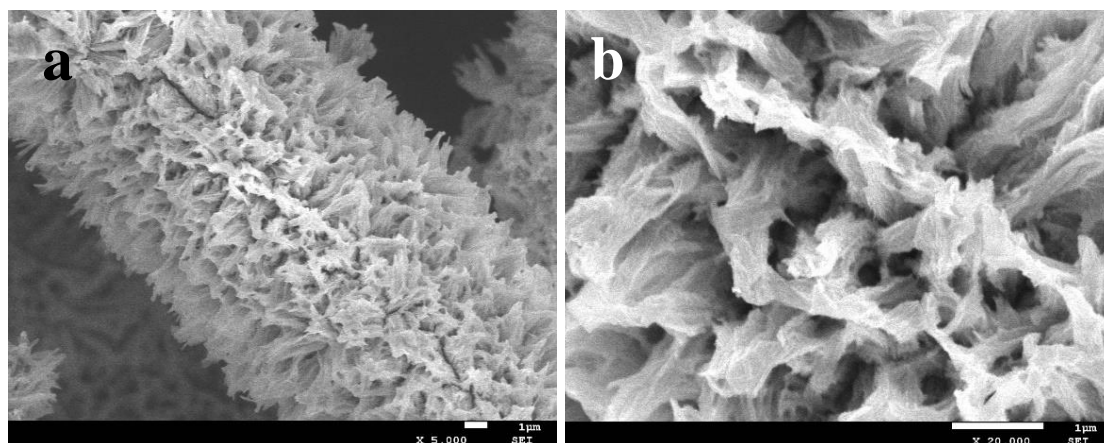

258 **Figure S1.** SEM images of FeOx(OH)<sub>y</sub> grown on the carbon fibers of CC.

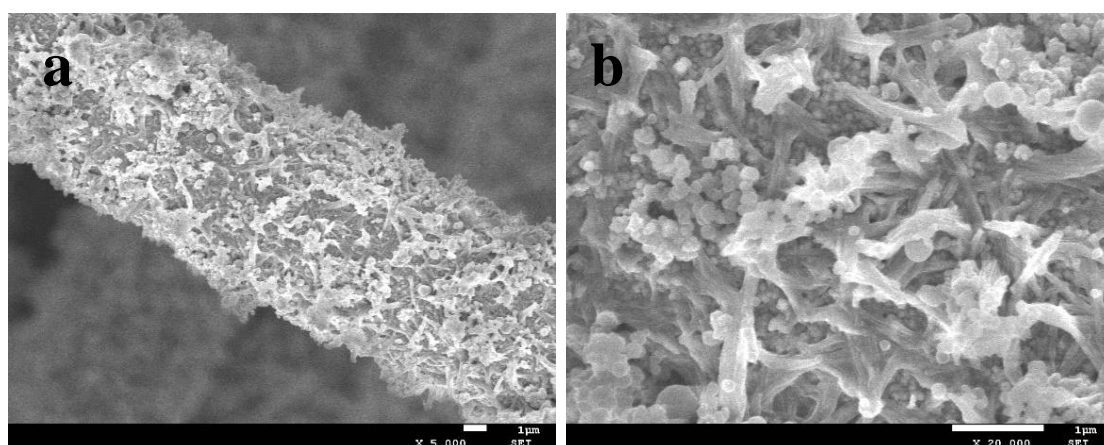

261 **Figure S2.** SEM images of FeOx(OH)<sub>y</sub>@PDA grown on the carbon fibers of CC.

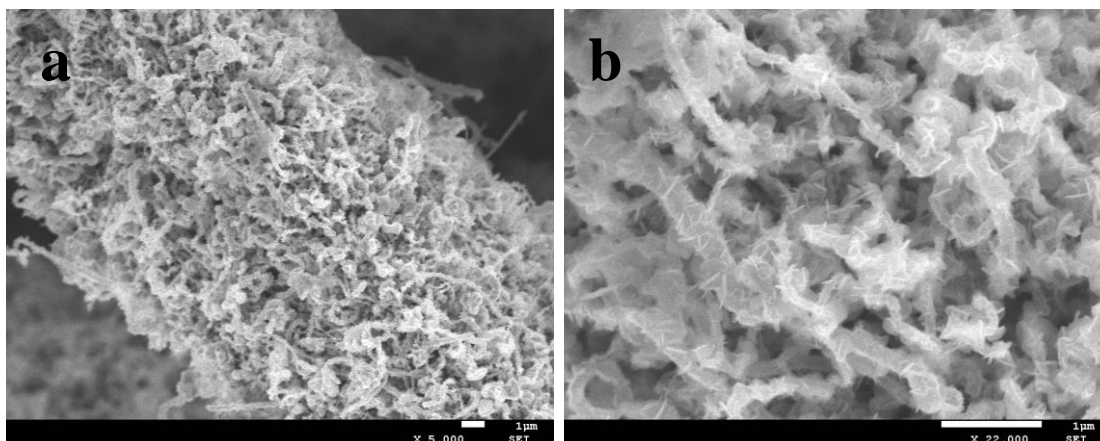

263

264 **Figure S3.** SEM images of Fe-NCNT@NiFe-LDH grown on the carbon fibers of CC,  
265 where NiFe-LDH is synthesized without CTAB addition.

266

267 As revealed in Figure S3, when CTAB was not added, the NiFe-LDH nanosheets on  
268 the surface of Fe-NCNT nanotubes were not uniformly distributed and had low  
269 coverage.

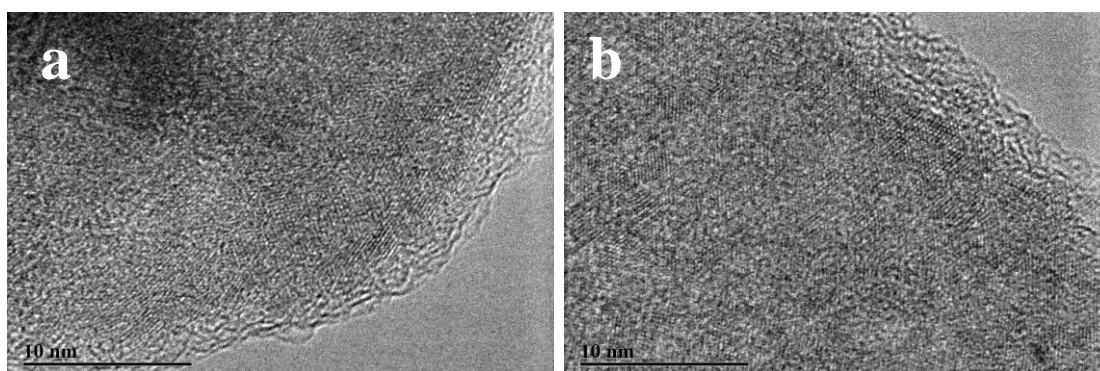

270

271 **Figure S4.** HRTEM images of NiFe-LDH of Fe-NCNT@NiFe-LDH.

272

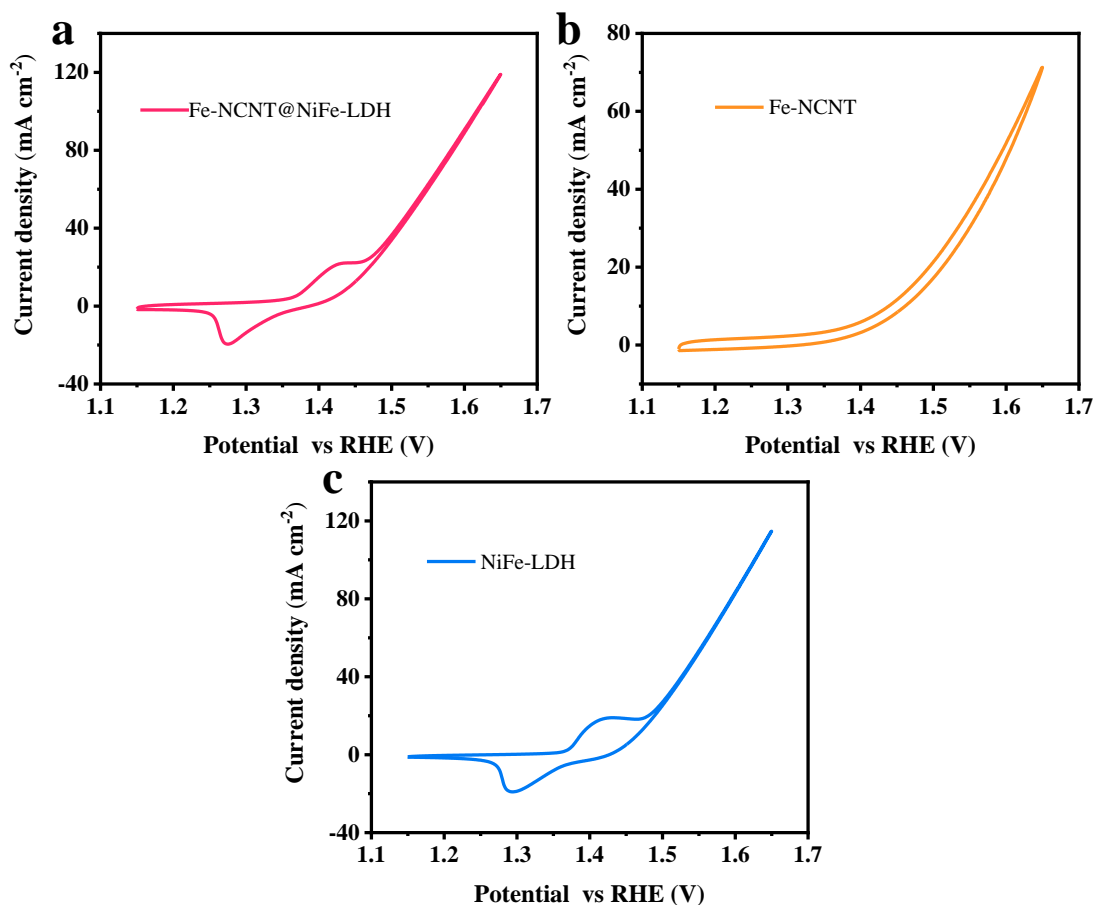

273

274 **Figure S5.** CV curves of (a) Fe-NCNT@NiFe-LDH, (b) Fe-NCNT, and (c) NiFe-LDH,

275 measured in O<sub>2</sub>-saturated 1 M KOH without *iR* compensation.

276

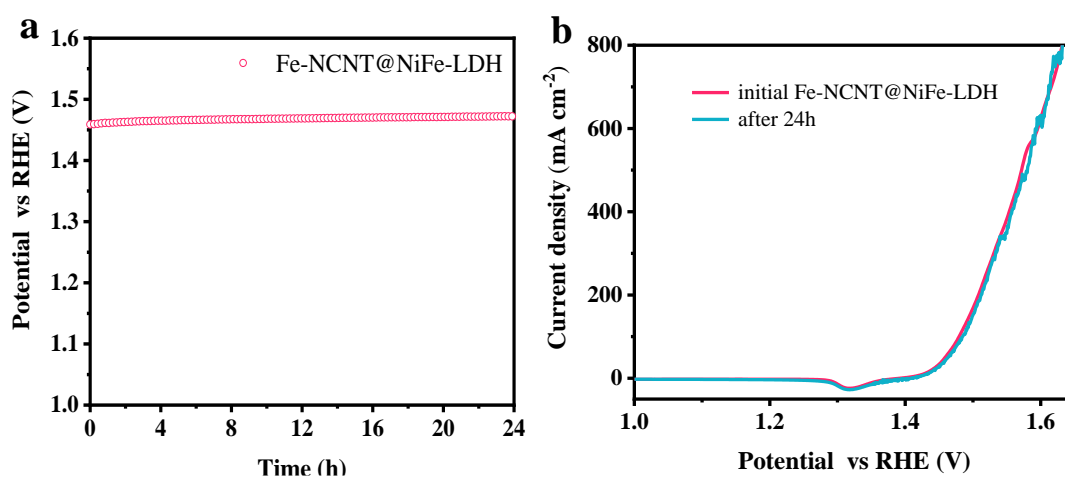

277

278 **Figure S6.** (a) Chronopotentiometric curve of Fe-NCNT@NiFe-LDH measured at a

279 constant current density of 10 mA cm<sup>-2</sup> for 24 h in O<sub>2</sub>-saturated 1 M KOH electrolyte,

280 (b) LSV curves before and after the stability test.

281

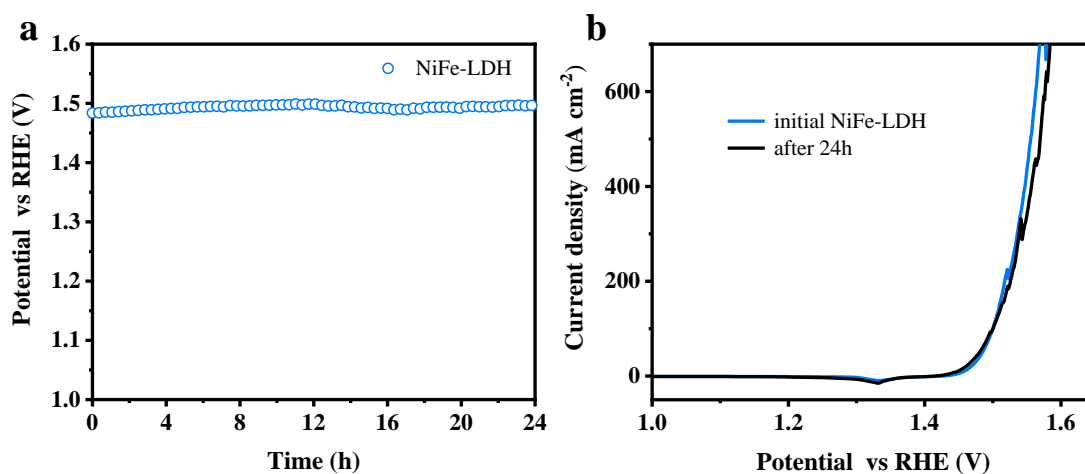

282

283 **Figure S7.** (a) Chronopotentiometric curve of NiFe-LDH measured at a constant

284 current density of 10 mA cm<sup>-2</sup> for 24 h in O<sub>2</sub>-saturated 1 M KOH electrolyte, (b) LSV

285 curves before and after the stability test.

286

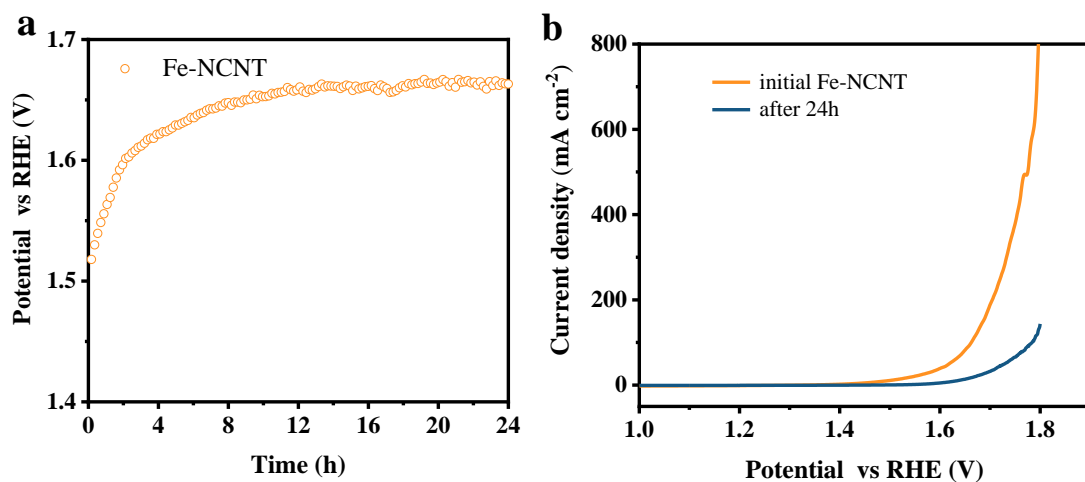

287

288 **Figure S8.** (a) Chronopotentiometric curve of Fe-NCNT measured at a constant current

289 density of 10 mA cm<sup>-2</sup> for 24 h in O<sub>2</sub>-saturated 1 M KOH electrolyte, (b) LSV curves

290 before and after the stability test.

291



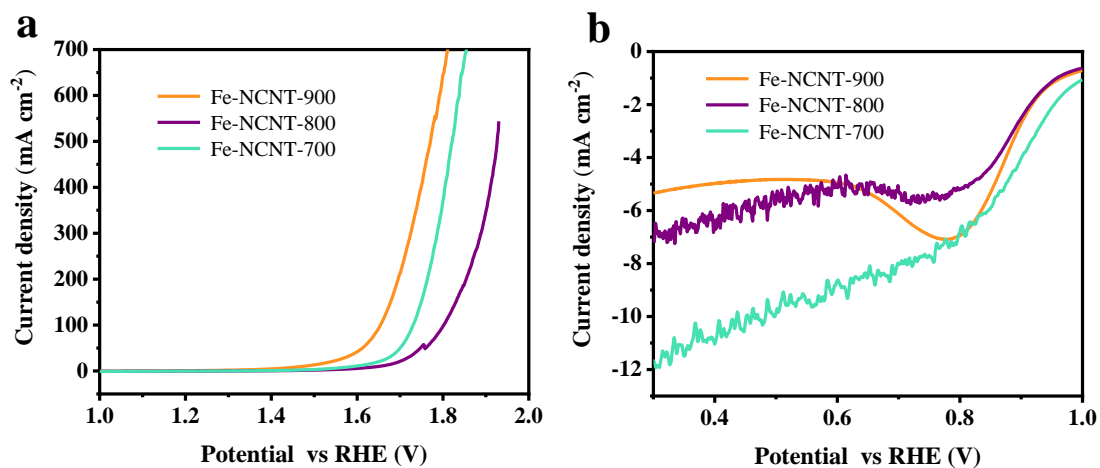

292

293 **Figure S9.** (a) OER-LSV curves and (b) ORR-LSV curves of Fe-NCNT-700, Fe-

294 NCNT-800 and Fe-NCNT-900, measured in O<sub>2</sub>-saturated 1 M KOH.

295

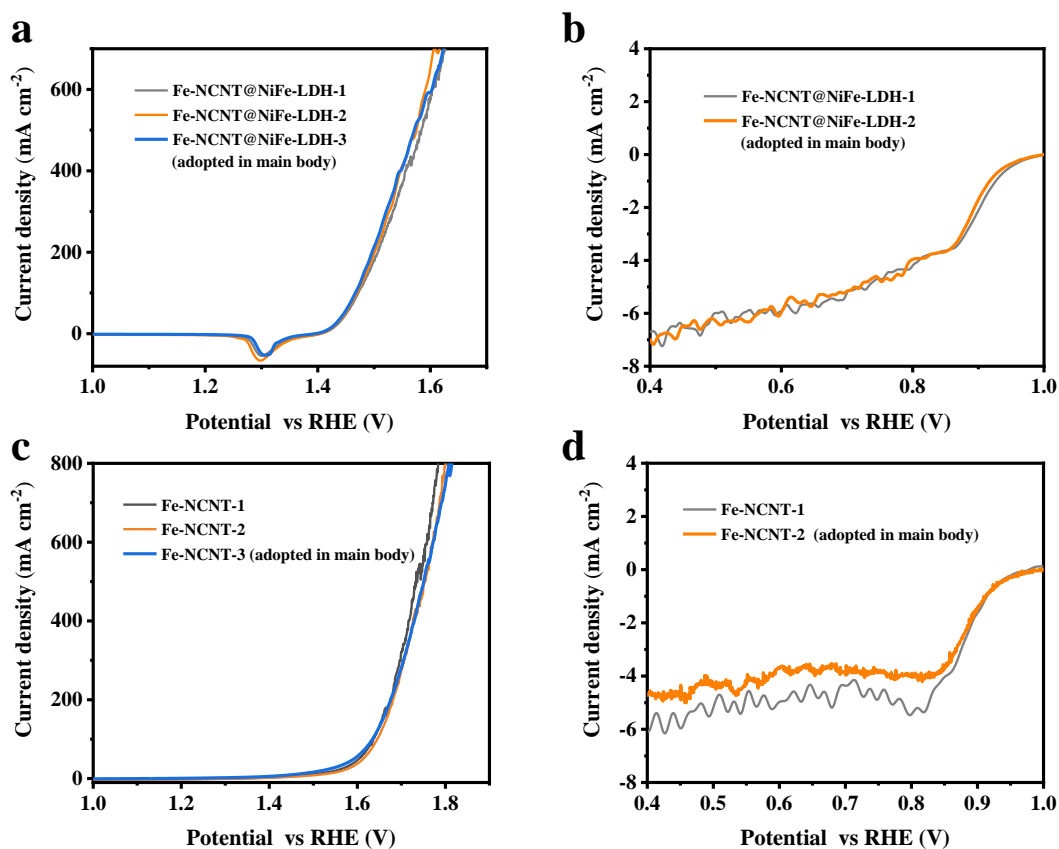

296

297 **Figure S10.** Reproducibility of Fe-NCNT@NiFe-LDH from different Batches: (a)

298 OER at 1 M KOH and (b) ORR at 0.1 M KOH; Reproducibility of Fe-NCNT from

299 different Batches: (a) OER at 1 M KOH and (b) ORR at 0.1 M KOH.

300

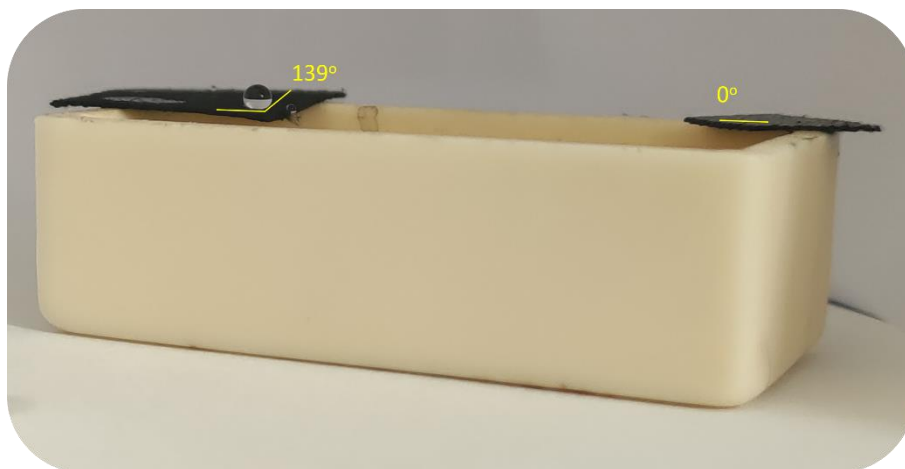

301

302 **Figure S11.** Contact angles of DI water on Fe-NCNT (in the left) and Fe-NCNT@NiFe-  
303 LDH (in the right).

304

305 **Notes: Movies S1** (Hydrophilicity/hydrophobicity evaluation of Fe-NCNT) **and S2**  
306 (Hydrophilicity/hydrophobicity evaluation of Fe-NCNT@NiFe-LDH) are separately  
307 uploaded as MP4 files.

308

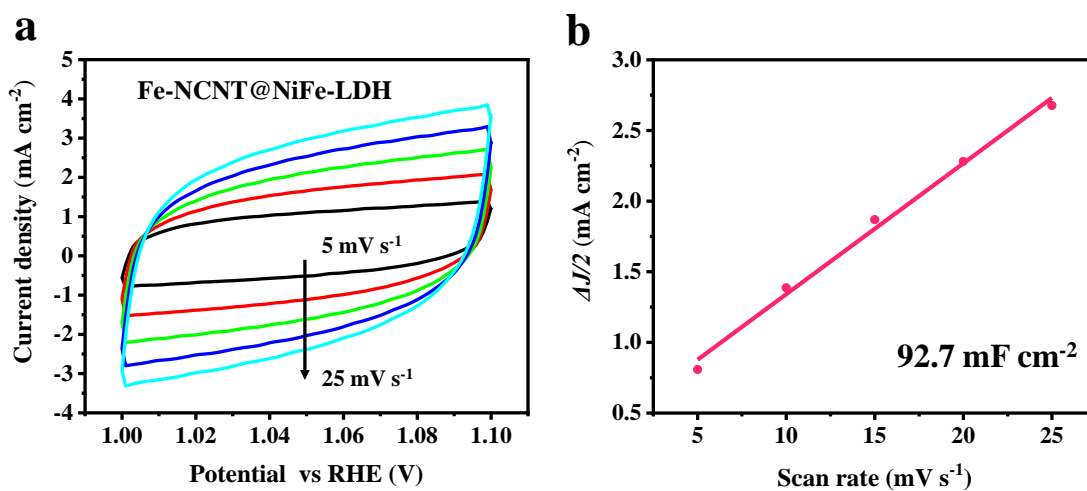

309

310 **Figure S12.** (a) CV curves of Fe-NCNT@NiFe-LDH at 5, 10, 15, 20, and 25 mV/s

311 scanning rates. (b) Correspondingly plot of the capacitive current as a function of the  
312 scan rate of the Fe-NCNT@NiFe-LDH.  
313

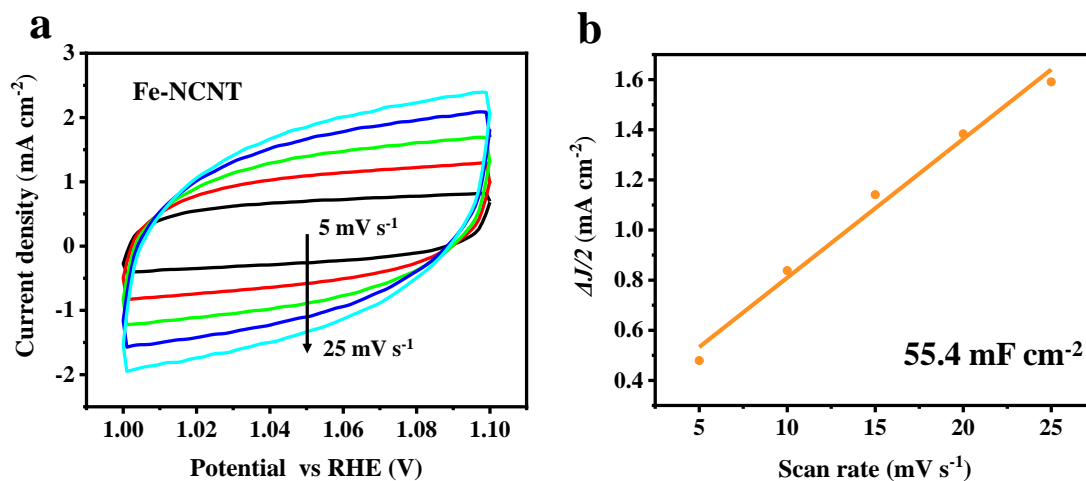

314  
315 **Figure S13.** (a) CV curves of Fe-NCNT at 5, 10, 15, 20, and 25 mV/s scanning rates.  
316 (b) Correspondingly plot of the capacitive current as a function of the scan rate of the  
317 Fe-NCNT.  
318

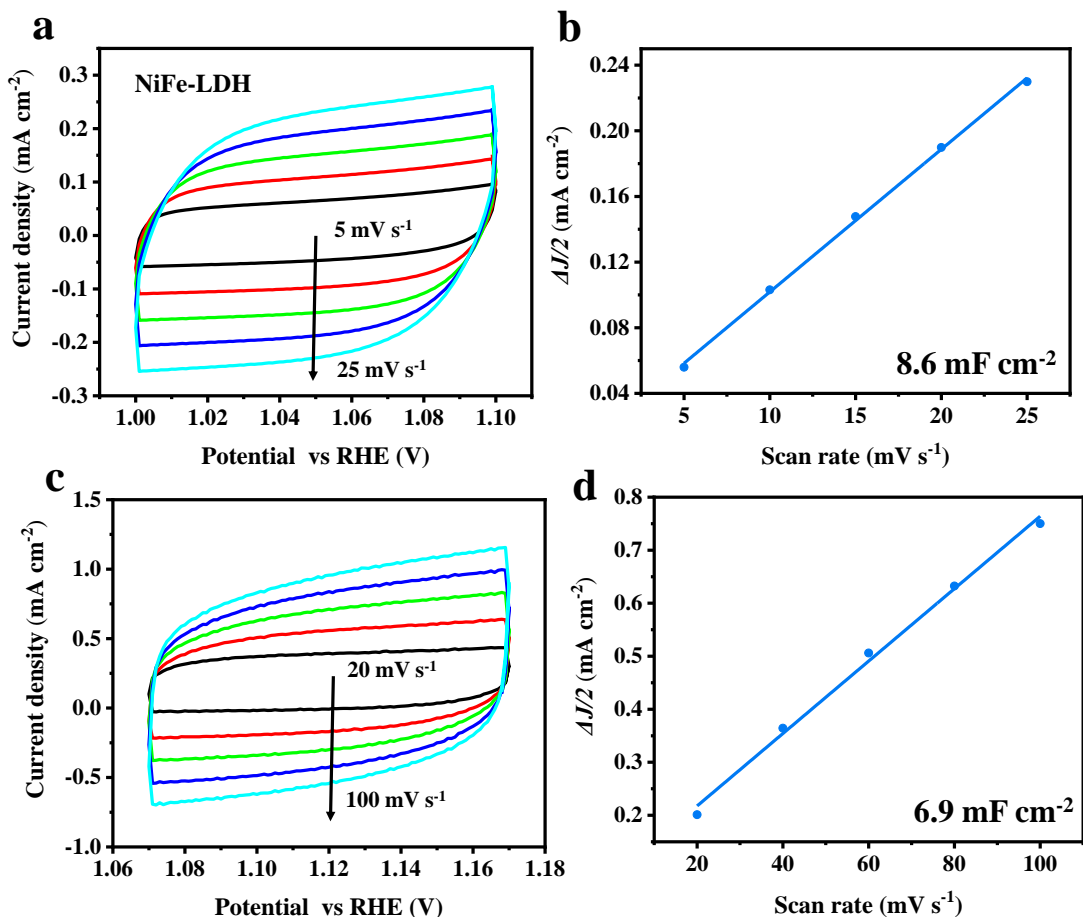

319

320 **Figure S14.** (a) CV curves of NiFe-LDH measured at 5, 10, 15, 20, and 25  $\text{mV/s}$

321 scanning rates in potential range from 1.0 to 1.1 V vs. RHE. (b) Correspondingly plot

322 of the capacitive current as a function of the scan rate of the Fe-NCNT@NiFe-LDH. (c)

323 CV curves of NiFe-LDH measured at 20, 40, 60, 80, and 100  $\text{mV/s}$  scanning rates in

324 potential range from 1.07 to 1.17 V vs. RHE. (d) Correspondingly plot of the capacitive

325 current as a function of the scan rate of the Fe-NCNT@NiFe-LDH.

326

327 Figures S11-13 show CV curves of Fe-NCNT@NiFe-LDH, Fe-NCNT, and NiFe-

328 LDH measured at non-Faradic potential ranges. The electrochemical double-layer

329 capacitance ( $C_{dl}$ ) is calculated from the CV curves via different sweep speeds. As shown

330 in Figures S10b, S11b, and S12b, the  $C_{dl}$  value of the Fe-NCNT@NiFe-LDH is 92.7

331  $\text{mF cm}^{-2}$ , which is higher than the Fe-NCNT ( $55.4 \text{ mF cm}^{-2}$ ), and much larger than that  
332 of NiFe-LDH ( $6.9\sim 8.6 \text{ mF cm}^{-2}$ ). The electrochemical active surface area (ECSA) of  
333 the catalysts are positively correlated with the value of  $C_{dl}$ . The  $C_{dl}$  trend clearly  
334 demonstrates that Fe-NCNT@NiFe-LDH has larger electrochemical active surface area  
335 per geometric area, superior to Fe-NCNT and NiFe-LDH. And the  $C_{dl}$  values of Fe-  
336 NCNT@NiFe-LDH and Fe-NCNT are almost 10 times of that of NiFe-LDH. The  
337 enhancement of ECSA of Fe-NCNT@NiFe-LDH probably originates from its uniform  
338 wrapping structure with thinner vertically grown NiFe-LDH nanosheets, facilitating to  
339 achieve high surface area and better mass accessibility.

340

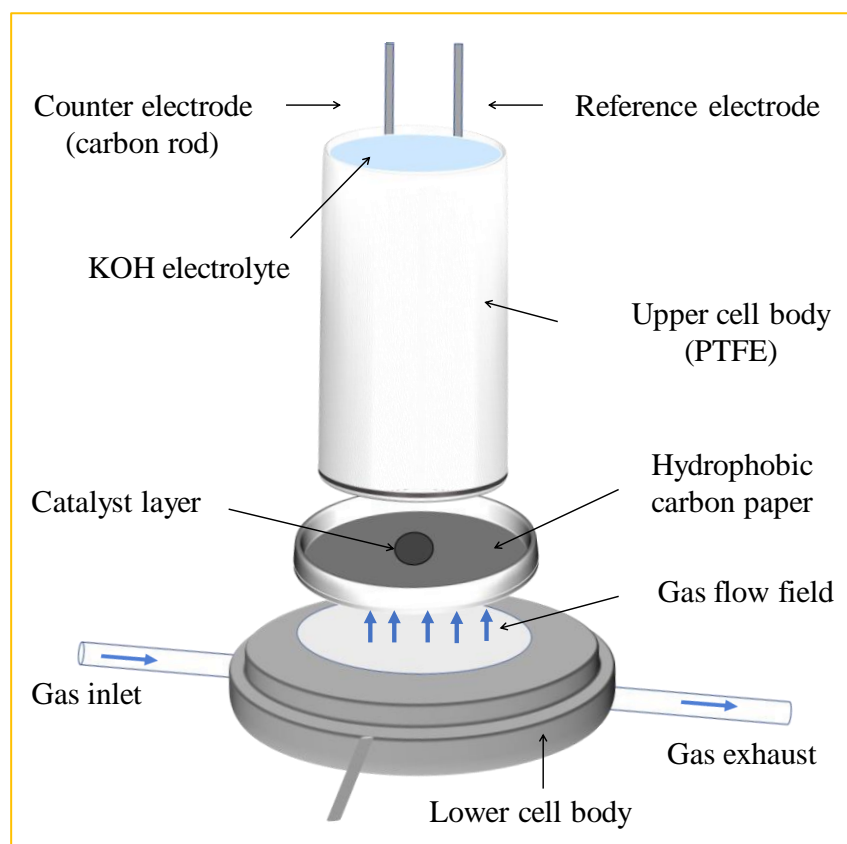

341

342 **Figure S15.** Schematic structure of GDE equipment.

343

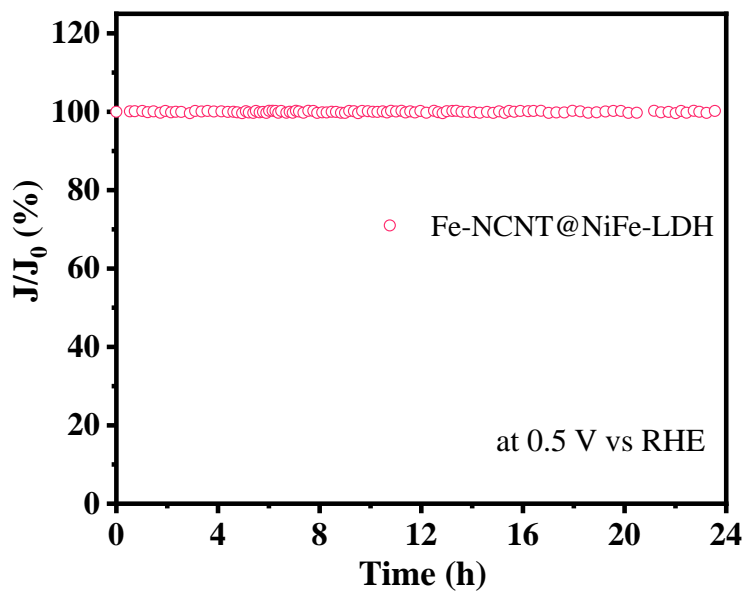

344

345 **Figure S16.** Durability test of Fe-NCNT@NiFe-LDH measured at constant potential

346 of 0.5 V vs RHE.

347

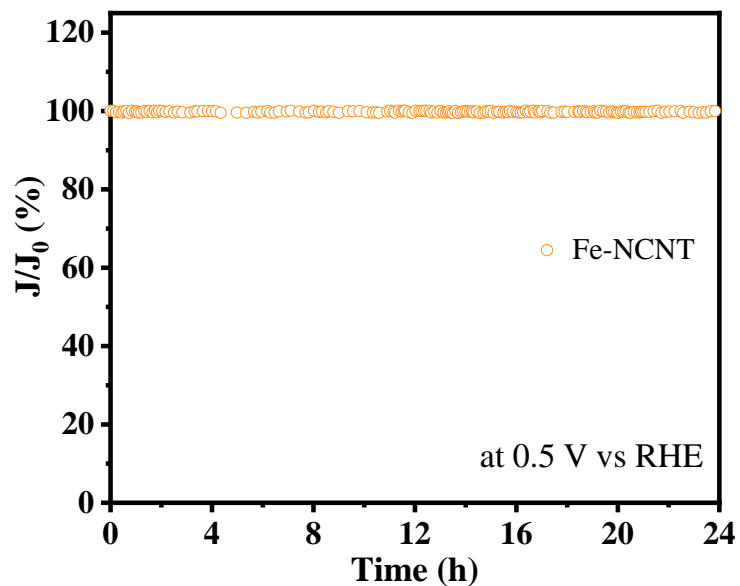

348

349 **Figure S17.** Durability test of Fe-NCNT measured at constant potential of 0.5 V vs

350 RHE.

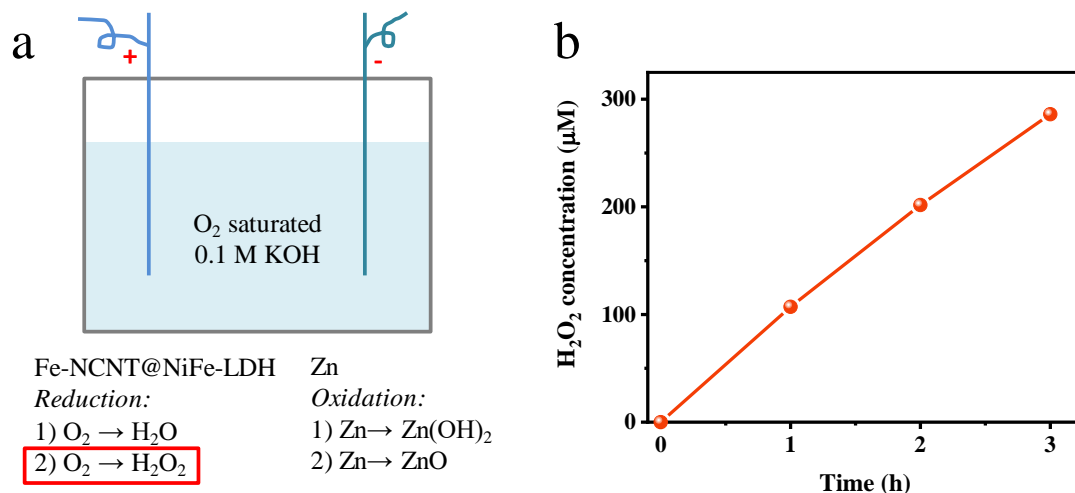

351

352 **Figure S18.** (a) A simulated Zn-air discharging battery and (b) The H<sub>2</sub>O<sub>2</sub> accumulation  
 353 along with discharging time. Conditions: The area of CFP/Fe-NCNT@NiFe-LDH is of  
 354 2 cm<sup>2</sup>, the area of Zn plate is of 6 cm<sup>2</sup>, the volume of the electrolyte is of 130 mL, and  
 355 the discharging current is 10 mA.

356

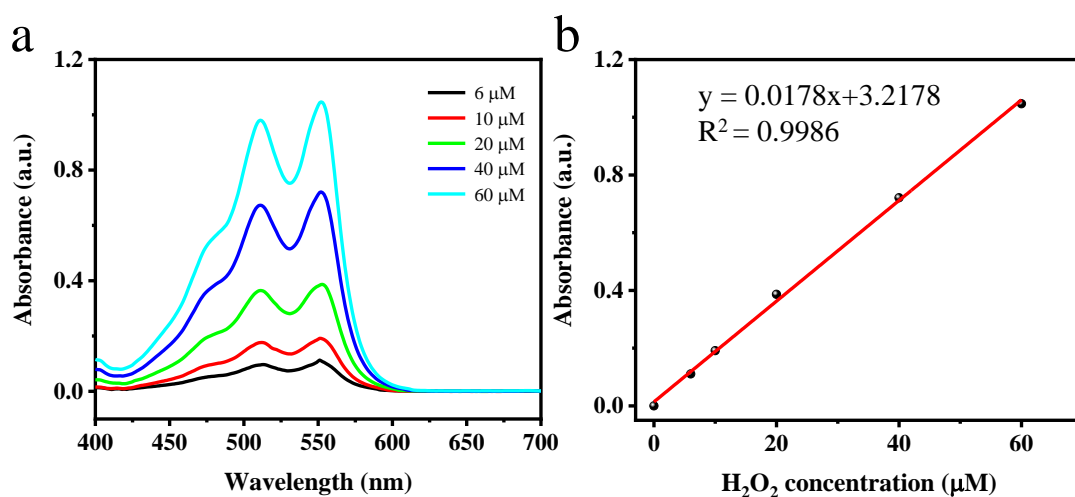

357

358 **Figure S19 (a)** The absorption spectra of H<sub>2</sub>O<sub>2</sub> at different concentrations (6 μM, 10  
 359 μM, 20 μM, 40 μM, 60 μM) at wavelengths of 400-700 nm; (b) and a standard curve  
 360 of H<sub>2</sub>O<sub>2</sub> concentration-absorbance was drawn.

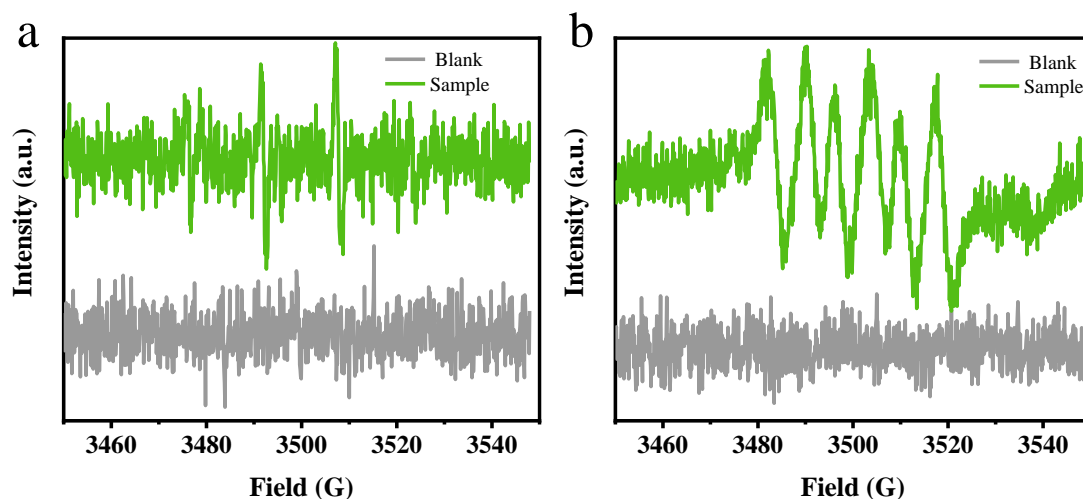

361

362 **Figure S20.** (a) ESR spectrum of DMPO-•OH and (b) DMPO-•OOH of the sample  
 363 solution composed of 0.1 M KOH aqueous solution with 0.03 mM FeSO<sub>4</sub> and 10 mM  
 364 H<sub>2</sub>O<sub>2</sub>, and blank contrast composed of 0.1 M KOH aqueous solution with 10 mM H<sub>2</sub>O<sub>2</sub>  
 365 (non Fe species added). The signals were collected after the radical trap (5,5-dimethyl-  
 366 1-pyrroline-N-oxide, DMPO) added for 30 min.

367

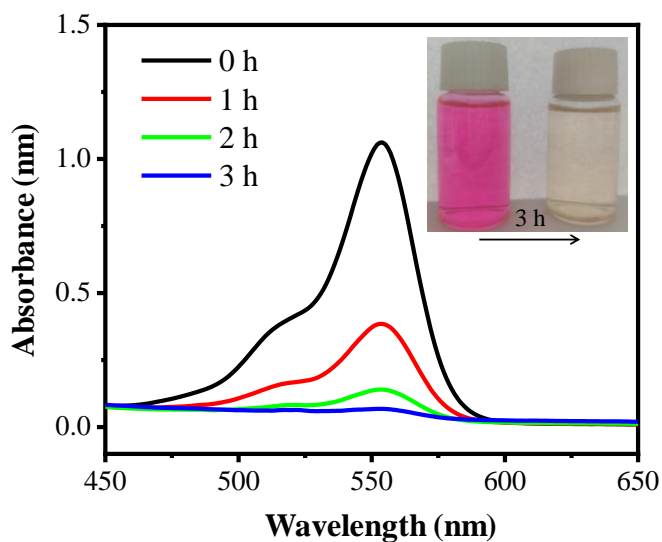

368

369 **Figure S21.** The degradation of Rhodamine B (RhB) via Fenton-like reactions. The  
 370 primary solution is composed of 0.1 M KOH aqueous solution with 0.03 mM FeSO<sub>4</sub>,  
 371 10 mM H<sub>2</sub>O<sub>2</sub> and 10 mg/L RhB.



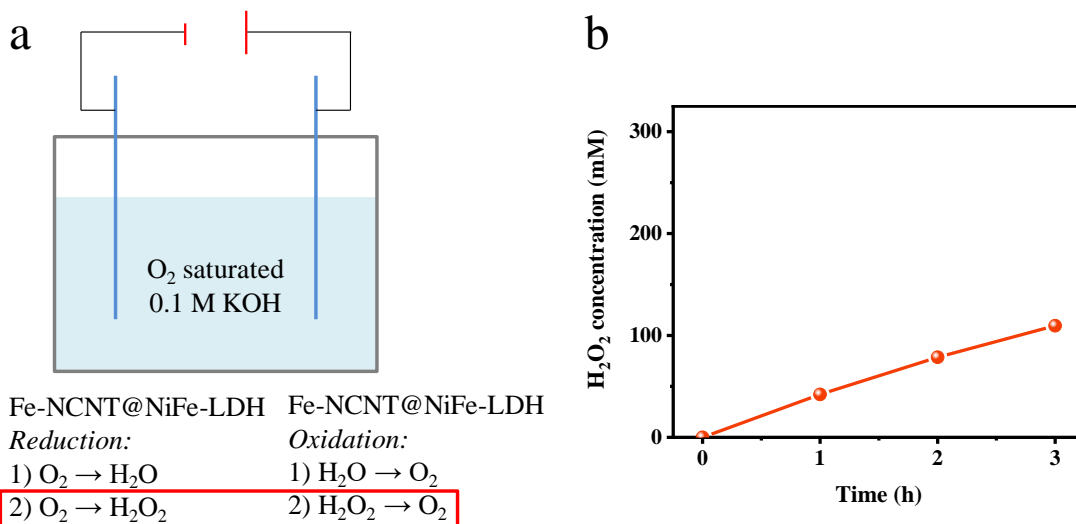

372

373 **Figure S22.** (a) A designed cell for simulating H<sub>2</sub>O<sub>2</sub> generation in ORR and  
 374 electrochemical consumption in POR. (b) The H<sub>2</sub>O<sub>2</sub> concentration varied along with  
 375 time. Conditions: The area of two electrodes (CFP/Fe-NCNT@NiFe-LDH) are of 2 cm<sup>2</sup>,  
 376 the volume of the electrolyte is of 130 mL, and the discharging current is 10 mA.

377

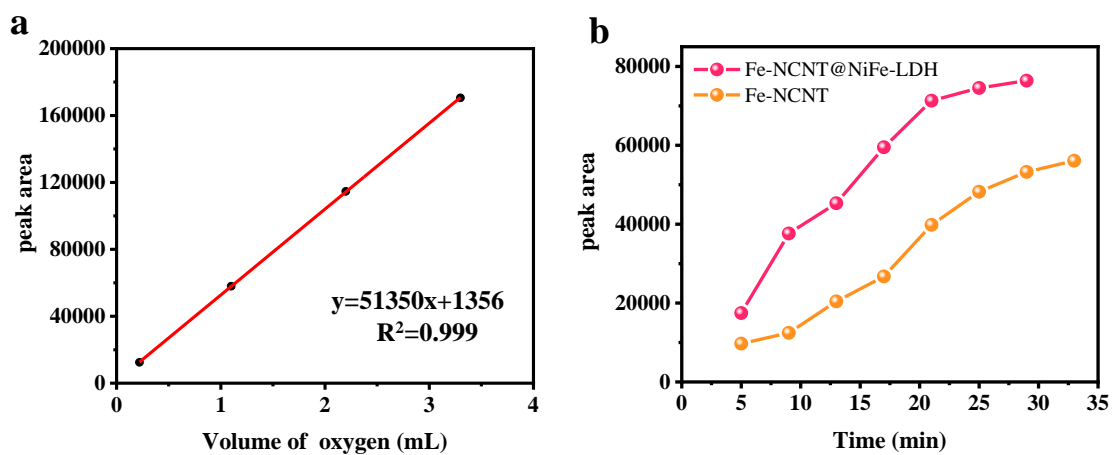

378

379 **Figure S23.** (a) Gas phase standard curve of oxygen, measured by gas chromatograph.

380 (b) Oxygen peak area at different times of Fe-NCNT@NiFe-LDH and Fe-NCNT.

381

382

383

384 **Notes: Movies S3** (The isproportionation of  $\text{H}_2\text{O}_2$  in NiFe-LDH contained  $\text{H}_2\text{O}_2$ -DI  
385 water system), **S4** (The isproportionation of  $\text{H}_2\text{O}_2$  in Fe-NCNT contained  $\text{H}_2\text{O}_2$ -DI  
386 water system), **S5** (The isproportionation of  $\text{H}_2\text{O}_2$  in Fe-NCNT@NiFe-LDH contained  
387  $\text{H}_2\text{O}_2$ -DI water system), and **S6** (The isproportionation of  $\text{H}_2\text{O}_2$  in Fe-NCNT@NiFe-  
388 LDH contained  $\text{H}_2\text{O}_2$ -1 M KOH-DI water system) are separately uploaded as MP4 files.

389

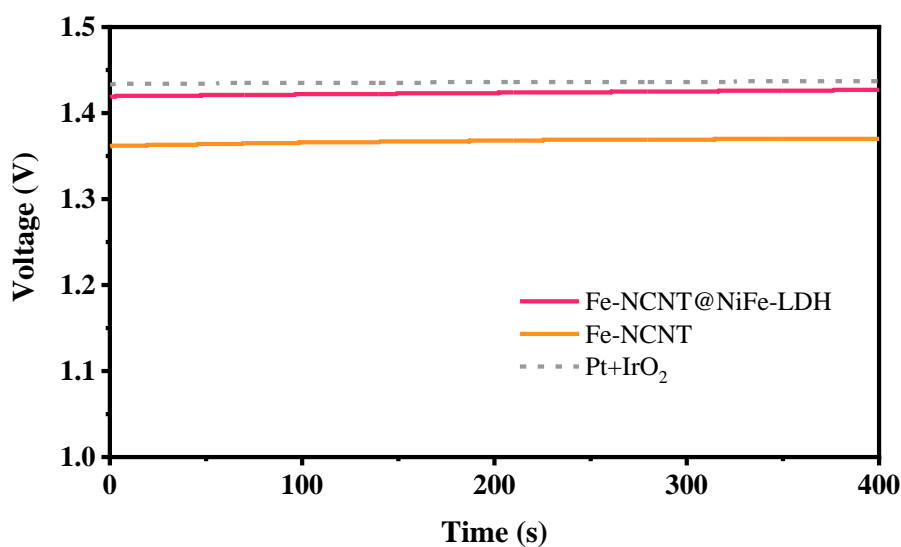

390

391 **Figure S24.** Open circuit curves of Fe-NCNT@NiFe-LDH, Fe-NCNT, and Pt+IrO<sub>2</sub>  
392 respectively assembled ZABs.

393

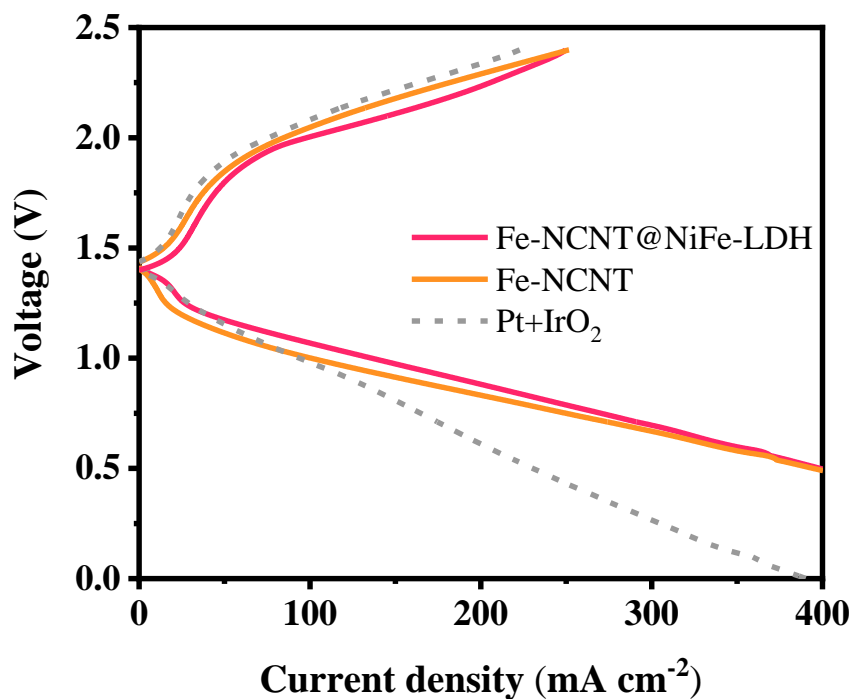

394

395 **Figure S25.** Discharge-charge polarization curves of Fe-NCNT@NiFe-LDH, Fe-  
 396 NCNT, and Pt+IrO<sub>2</sub> respectively assembled ZABs.

397

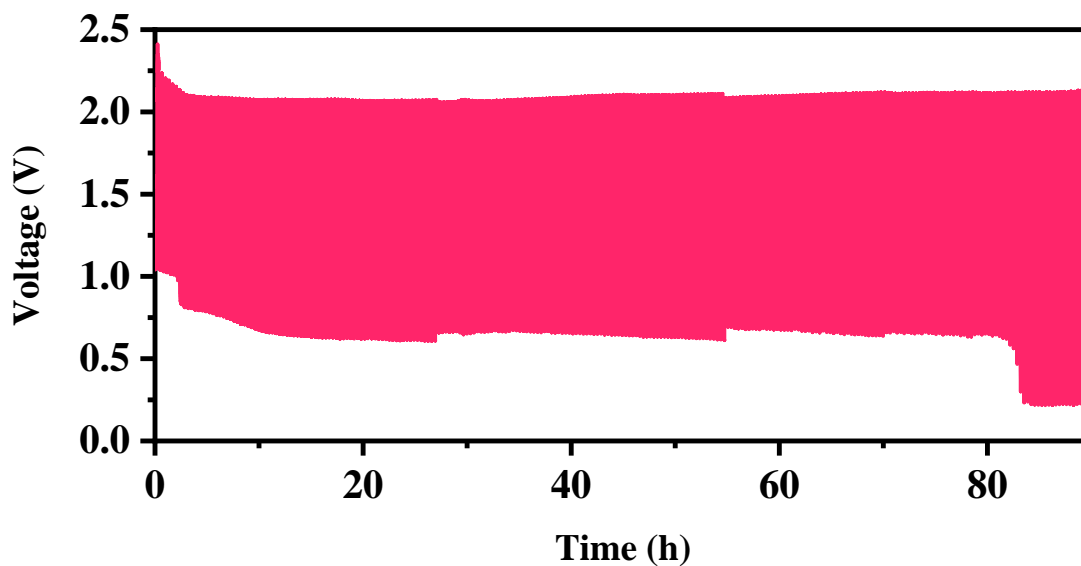

398

399 **Figure S26.** Charge/discharge cycle test at 100 mA cm<sup>-2</sup> current density for Fe-  
 400 NCNT@NiFe-LDH based ZAB.

401

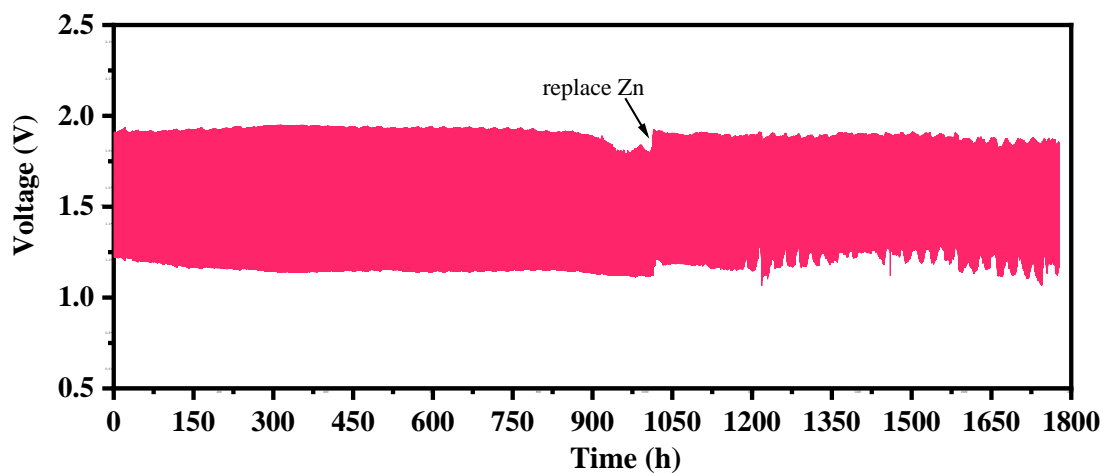

402

403 **Figure S27.** Charge/discharge cycle test at  $10 \text{ mA cm}^{-2}$  current density for Fe-

404 NCNT@NiFe-LDH based ZAB.

405

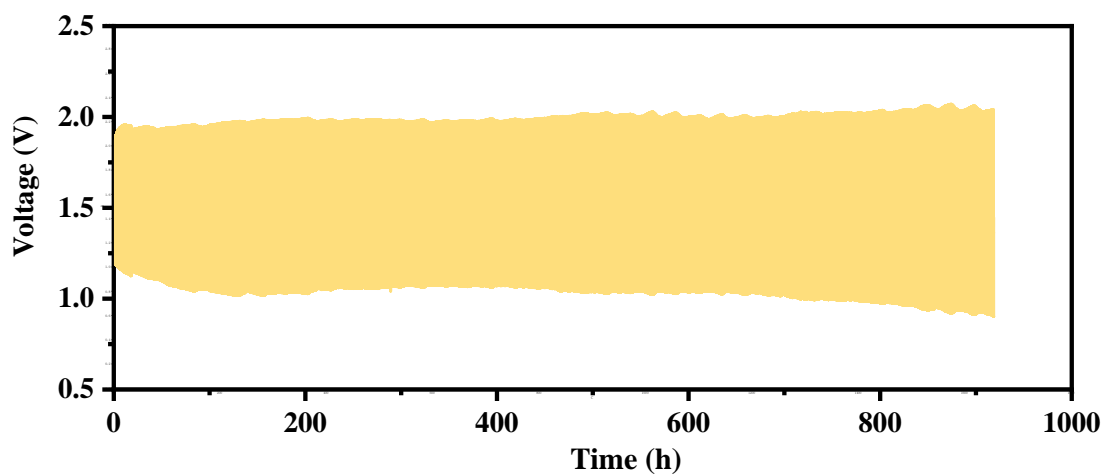

406

407 **Figure S28.** Charge/discharge cycle test at  $10 \text{ mA cm}^{-2}$  current density for Fe-NCNT

408 based ZAB.

409

410

411

412

413

414 **Tables**

415 **Table S1.** Comparison of OER performance of Fe-NCNT@NiFe-LDH with recently  
 416 reported electrocatalysts.<sup>14-25</sup>

| Sample                                                | OER            |                 |                                     | References       |
|-------------------------------------------------------|----------------|-----------------|-------------------------------------|------------------|
|                                                       | $E_{j=10}$ (V) | $E_{j=100}$ (V) | Tafel slope (mV dec <sup>-1</sup> ) |                  |
| <b>Fe-NCNT@NiFe-LDH</b>                               | <b>1.41</b>    | <b>1.46</b>     | <b>37</b>                           | <b>This work</b> |
| FeCoSn(OH) <sub>6</sub> -300                          | 1.50           | 1.55            | 39                                  | 14               |
| Ni <sub>83</sub> Fe <sub>17</sub> -ONCAs              | 1.42           | 1.46            | 48                                  | 15               |
| (Fe,Co)OOH/MI                                         | 1.46           | 1.52            | 53                                  | 16               |
| CF-FeSO                                               | 1.42           | 1.46            | 40                                  | 17               |
| Br-Ni-MOF (A)                                         | 1.54           | 1.71            | 79                                  | 18               |
| W-NiS <sub>0.5</sub> Se <sub>0.5</sub>                | 1.40           | 1.47            | 41                                  | 19               |
| a-LNFBPO                                              | 1.44           | 1.52            | 37                                  | 20               |
| OLC-Co-N-C                                            | 1.57           | 1.66            | 58                                  | 21               |
| Ir/CoNiB                                              | 1.41           | 1.47            | 35                                  | 22               |
| ENWs-FeNi-C <sub>2</sub> O <sub>4</sub>               | 1.44           | 1.5             | 54                                  | 23               |
| Co <sub>3</sub> O <sub>4</sub> -Mo <sub>2</sub> N NFs | 1.45           | 1.62            | 88                                  | 24               |
| F-Ni <sub>27</sub> Fe <sub>10</sub> LDH               | 1.46           | 1.48            | 29.7                                | 25               |

417

418

419

420

421

422 **Table S2.** OER and ORR electrochemical performances of Fe-NCNT@NiFe-LDH,  
 423 Fe-NCNT, and NiFe-LDH in 1 M KOH.

| Sample                  | OER              |                   | Tafel slope<br>(mV dec <sup>-1</sup> ) | ORR           | $\Delta E$                |
|-------------------------|------------------|-------------------|----------------------------------------|---------------|---------------------------|
|                         | $\eta_{10}$ (mV) | $\eta_{100}$ (mV) |                                        | $E_{1/2}$ (V) | $E_{j=10}-E_{1/2}$<br>(V) |
| <b>Fe-NCNT@NiFe-LDH</b> | <b>180</b>       | <b>230</b>        | <b>37</b>                              | <b>0.87</b>   | <b>0.54</b>               |
| <b>NiFe-LDH</b>         | 250              | 300               | 39                                     | 0.78          | 0.70                      |
| <b>Fe-NCNT</b>          | 230              | 410               | 143                                    | 0.85          | 0.61                      |

424

425 **Table S3.** OER and ORR electrochemical performances of Fe-NCNT@NiFe-LDH, Fe-  
 426 NCNT, and NiFe-LDH in 0.1 M KOH.

| Sample                  | OER              |                                        | $E_{1/2}$ (V) | $\Delta E$                |
|-------------------------|------------------|----------------------------------------|---------------|---------------------------|
|                         | $\eta_{10}$ (mV) | Tafel slope<br>(mV dec <sup>-1</sup> ) |               | $E_{j=10}-E_{1/2}$<br>(V) |
| <b>Fe-NCNT@NiFe-LDH</b> | <b>210</b>       | <b>49</b>                              | <b>0.89</b>   | <b>0.55</b>               |
| <b>NiFe-LDH</b>         | 260              | 57                                     | 0.69          | 0.80                      |
| <b>Fe-NCNT</b>          | 250              | 185                                    | 0.88          | 0.60                      |

427

428

429

430

431

432

433

434

435

436

437

438

439 **Table S4** Comparison of overpotential difference ( $\Delta E = E_{j=10} - E_{1/2}$ ) and ZAB (two-  
 440 electrode cell) performance of (or based on) Fe-NCNT@NiFe-LDH with recently  
 441 reported electrocatalysts.<sup>25-62</sup>

| Sample                                                        | OER-ORR           |                   |                  | ZABs                                          |                                                                                                                 | References       |
|---------------------------------------------------------------|-------------------|-------------------|------------------|-----------------------------------------------|-----------------------------------------------------------------------------------------------------------------|------------------|
|                                                               | $\Delta E$<br>(V) | $E_{j=10}$<br>(V) | $E_{1/2}$<br>(V) | Power<br>density<br>(mW<br>cm <sup>-2</sup> ) | cycling ability<br>X h / Y cycle<br>@ Z mA cm <sup>-2</sup>                                                     |                  |
| <b>Fe-NCNT@NiFe-LDH</b>                                       | <b>0.52</b>       | <b>1.41</b>       | <b>0.89</b>      | <b>204</b>                                    | <b>1743 h / 5229<br/>cycle @ 50</b><br><b>1777 h / 5331<br/>cycle @ 10</b><br><b>80 h / 240<br/>cycle @ 100</b> | <b>This work</b> |
| FeNC   F-Ni <sub>27</sub> Fe <sub>10</sub><br>LDH  Zn(0.2 mm) | 0.53              | 1.43              | 0.90             | 259                                           | 258 h @ 10                                                                                                      | 25               |
| CoNC@LDH                                                      | 0.63              | 1.47              | 0.84             | 173                                           | 3600cycle@10<br>656 cycle@50<br>29 cycle@100                                                                    | 26               |
| Co SA/NCFs                                                    | 0.76              | 1.61              | 0.85             | 154                                           | 600 h @ 10                                                                                                      | 27               |
| Fe <sub>2</sub> Ni <sub>3</sub> -NFCM                         | 0.69              | 1.51              | 0.82             | 128                                           | 10 h @ 10                                                                                                       | 28               |
| Co-NC@LDH                                                     | 0.80              | 1.6               | 0.8              | 107                                           | 300 h @ 5                                                                                                       | 29               |
| FeNi@NCSs                                                     | 0.71              | 1.55              | 0.84             | 128                                           | 120 h @ 5                                                                                                       | 30               |
| Mn-RuO <sub>2</sub>                                           | 0.64              | 1.5               | 0.86             | 181                                           | 2500 h @ 10<br>467 h @ 50<br>300 h @ 100                                                                        | 31               |
| NiFe-LDH/FeSoy-<br>CNSs-A                                     | 0.62              | 1.53              | 0.91             | 238                                           | 50 h @ 5                                                                                                        | 32               |
| FeNi/N-LCN                                                    | 0.72              | 1.57              | 0.85             | 162                                           | 1100 h @ 5<br>600 h @ 10                                                                                        | 33               |
| glu-NiFe                                                      | 0.82              | 1.67              | 0.85             | 127                                           | 240 h @ 5                                                                                                       | 34               |
| NiFe/N-CNT                                                    | 0.77              | 1.52              | 0.75             | 300                                           | 300 cycle @ 5                                                                                                   | 35               |

|                                              |      |      |      |     |                          |    |
|----------------------------------------------|------|------|------|-----|--------------------------|----|
| NiFe-ND/FeCo-NC                              | 0.81 | 1.66 | 0.85 | 141 | 160 h @ 20               | 36 |
| Fe-Me-Ni                                     | 0.70 | 1.54 | 0.84 | 168 | 102 h @ 10               | 37 |
| defected-NiFe LDH                            | 0.72 | 1.47 | 0.75 | 35  | 100 cycle@ 10            | 38 |
| NiCo <sub>2</sub> S <sub>4</sub> @NiFe LDH   | 0.67 | 1.50 | 0.83 | --  | --                       | 39 |
| DBD-NiFe/NiSe <sub>2</sub> @NCNT             | 0.71 | 1.52 | 0.81 | 132 | 1000 cycle@10            | 40 |
| NiFe@N-CFs                                   | 0.7  | 1.53 | 0.83 | 102 | 480 h @ 10<br>330 h @ 20 | 41 |
| S-Ni <sub>3</sub> FeN/NSG                    | 0.61 | 1.49 | 0.88 | 207 | 1200 cycle@10            | 42 |
| NiFe-Mi-C-Gr                                 | 0.68 | 1.54 | 0.85 | 111 | 100 h @ 10               | 43 |
| NiFe@C@Co CNFs                               | 0.70 | 1.57 | 0.87 | 130 | 200 h @ 5                | 44 |
| NiFe-DG                                      | 0.73 | 1.59 | 0.86 | 148 | 12 h @ 10                | 45 |
| NiFe@NCNT                                    | 0.77 | 1.56 | 0.79 | 360 | 200 h @ 10               | 46 |
| NiFe LDH@Fe-N-CNFs                           | 0.86 | 1.58 | 0.72 | 158 | 185 h @ 10               | 47 |
| LDH@N-CoOx@C                                 | 0.66 | 1.50 | 0.84 | 156 | 150 h @ 5                | 48 |
| ZGNiFe@NG                                    | 0.84 | 1.65 | 0.81 | 140 | 120 h @ 5                | 49 |
| NiFe <sub>3</sub> @NGHSNCNTs                 | 0.79 | 1.61 | 0.82 | 126 | 1000 cycle@10            | 50 |
| FeCo-NPCNs                                   | 0.6  | 1.47 | 0.87 | 161 | 400 cycle@10             | 51 |
| Co <sub>9</sub> S <sub>8</sub> @Co/Mn-S,N-PC | 0.7  | 1.55 | 0.85 | 80  | 210 h @ 10               | 52 |
| FeN <sub>x</sub> /NC-S                       | 0.63 | 1.55 | 0.92 | 194 | 65 h @ 10                | 53 |
| Co@NrC-0.3                                   | 0.76 | 1.61 | 0.85 | 168 | 40 h @ 2                 | 54 |
| Co@N-HPC-800                                 | 0.87 | 1.69 | 0.82 | 89  | 25 h @ 5                 | 55 |
| Co@CoFe <sub>0.01</sub> -N-C                 | 0.81 | 1.65 | 0.84 | 174 | 100 h @ 1                | 56 |
| BN-PCN                                       | 0.87 | 1.71 | 0.84 | 194 | 1000 h @ 5               | 57 |



|                                                    |      |      |      |     |                            |    |
|----------------------------------------------------|------|------|------|-----|----------------------------|----|
| o-CoSe <sub>2</sub> /AK                            | 0.77 | 1.61 | 0.84 | 122 | 90 h @ 5                   | 58 |
| NG/Ni                                              | 0.63 | 1.49 | 0.86 | 165 | 2500 h @ 2                 | 59 |
| CoWCP-NPC-2:1                                      | 0.63 | 1.43 | 0.80 | 205 | 83.5 h / 501<br>cycle @ 10 | 60 |
| CoS/Co/MoC-N,S-<br>PCNFs                           | 0.65 | 1.52 | 0.87 | 169 | 50 h @ 2                   | 61 |
| Ti <sub>3</sub> C <sub>2</sub> @SrTiO <sub>3</sub> | 0.65 | 1.43 | 0.78 | 122 | 500 h@10                   | 62 |

442

443 The  $\Delta E$  values of catalysts containing NiFe nanosheets are concentrated in the range  
444 of 0.6–0.75 V, such as NiFe-LDH/FeSoy-CNSs-A<sup>32</sup> with a  $\Delta E$  of 0.62 V ( $E_{1/2}$  of 0.91  
445 V and  $E_{j=10}$  of 1.53 V), CoNC@LDH<sup>26</sup> with a  $\Delta E$  of 0.63 V ( $E_{1/2}$  of 0.84 V and  $E_{j=10}$  of  
446 1.47 V), NiCo<sub>2</sub>S<sub>4</sub>@NiFe-LDH<sup>39</sup> with  $\Delta E$  of 0.63 V ( $E_{1/2}$  of 0.83 V and  $E_{j=10}$  of 1.497  
447 V), and LDH@N-CoOx@C<sup>48</sup> with  $\Delta E$  of 0.665 V ( $E_{1/2}$  of 0.83 V and  $E_{j=10}$  of 1.503 V).  
448 The  $\Delta E$  of catalysts containing NiFe nanoparticles are principally concentrated in the  
449 scope of 0.7–0.85 V, such as Fe–Me–Ni<sup>37</sup> with  $\Delta E$  of 0.702 V ( $E_{1/2}$  of 0.841 V and  $E_{j=10}$   
450 of 1.543 V), NiFe@C@Co-CNFs<sup>44</sup> with  $\Delta E$  of 0.7 V ( $E_{1/2}$  of 0.87 V and  $E_{j=10}$  of 1.57  
451 V), NiFe@NCNTs<sup>46</sup> with  $\Delta E$  of 0.77 V ( $E_{1/2}$  of 0.79 V and  $E_{j=10}$  of 1.56 V), and  
452 ZGNiFe@NG<sup>49</sup> with  $\Delta E$  of 0.84 V ( $E_{1/2}$  of 0.81 V and  $E_{j=10}$  of 1.65 V).

453

## 454 References

- 455 1 H. Cai, X. Li, D. Ma, Q. Feng, D. Wang, Z. Liu, X. Wei, K. Chen, H. Lin, S. Qin  
456 and F. Lu, *Sci. Total. Environ.*, 2021, **764**, 144200.
- 457 2 N. D. Mohamad, Z. M. Zaki and A. Amir, *J. Environ. Chem. Eng.*, 2022, **10**,  
458 107787.

- 459 3 Q. Zhang, P. Kumar, X. Zhu, R. Daiyan, N. M. Bedford, K. H. Wu, Z. Han, T.  
460 Zhang, R. Amal and X. Lu, *Adv. Energy Mater.*, 2021, **11**, 2100303.
- 461 4 H. Xie, X. Xie, G. Hu, V. Prabhakaran, S. Saha, L. Gonzalez-Lopez, A. H.  
462 Phakatkar, M. Hong, M. Wu, R. Shahbazian-Yassar, V. Ramani, M. I. Al-Sheikhly,  
463 D. Jiang, Y. Shao and L. Hu, *Nature Energy*, 2022, **7**, 281-289.
- 464 5 K. Ehelebe, D. Seeberger, M. T. Y. Paul, S. Thiele, K. J. J. Mayrhofer and S.  
465 Cherevko, *J. Electrochem. Soc.*, 2019, **166**, F1259-F1268.
- 466 6 M. Inaba, A. W. Jensen, G. W. Sievers, M. Escudero-Escribano, A. Zana and M.  
467 Arenz, *Energy Environ. Sci.*, 2018, **11**, 988-994.
- 468 7 J. Liu, Z. Gong, C. Allen, W. Ge, H. Gong, J. Liao, J. Liu, K. Huang, M. Yan, R.  
469 Liu, G. He, J. Dong, G. Ye and H. Fei, *Chem Catal.*, 2021, **1**, 1291-1307.
- 470 8 J. Wang, Z. Shu, Z. Chen, J. Su and C. Liu, *J. Clean Prod.*, 2022, **337**, 130489.
- 471 9 G. I. Berglund, G. H. Carlsson, A. T. Smith, H. Szöke, A. Henriksen and J. Hajdu,  
472 *Nature*, 2002, **417**, 463-468.
- 473 10 Y. Liu, Z. Li, F. Fan, X. Zhu, L. Jia, M. Chen, P. Du, L. Yang and S. Yang, *Adv.*  
474 *Sci.*, 2021, **8**, 2102422.
- 475 11 N. Ye, D. Zhang, Y. Yang, R. Wan, X. Peng, S. Chen, Q. Zhan and R. He, *Solid*  
476 *State Ionics.*, 2021, **362**, 115582.
- 477 12 B. Yan, Z. Shi, J. Lin, L. Zhang, L. Han, X. Shi and Q. Yang, *Environ. Sci. Nano*,  
478 2022, **9**, 532-541.
- 479 13 M. Kou, Y. Wang, Y. Xu, L. Ye, Y. Huang, B. Jia, H. Li, J. Ren, Y. Deng, J. Chen,  
480 Y. Zhou, K. Lei, L. Wang, W. Liu, H. Huang and T. Ma, *Angew. Chem. Int. Ed.*,

481 2022, **61**, e202200413.

482 14 S. Liu, S. Geng, L. Li, Y. Zhang, G. Ren, B. Huang, Z. Hu, J. F. Lee, Y. H. Lai, Y.  
483 H. Chu, Y. Xu, Q. Shao and X. Huang, *Nat. Commun.*, 2022, **13**, 1187.

484 15 P. Liu, B. Chen, C. Liang, W. Yao, Y. Cui, S. Hu, P. Zou, H. Zhang, H. J. Fan and  
485 C. Yang, *Adv. Mater.*, 2021, **33**, 2007377.

486 16 W. Huang, J. Li, X. Liao, R. Lu, C. Ling, X. Liu, J. Meng, L. Qu, M. Lin, X. Hong,  
487 X. Zhou, S. Liu, Y. Zhao, L. Zhou and L. Mai, *Adv. Mater.*, 2022, **34**, 2200270.

488 17 W. H. Lee, M. H. Han, Y. J. Ko, B. K. Min, K. H. Chae and H. S. Oh, *Nat.*  
489 *Commun.*, 2022, **13**, 605.

490 18 W. Cheng, S. Xi, Z. P. Wu, D. Luan and X. W. Lou, *Sci. Adv.*, 2021, **7**, eabk0919.

491 19 Y. Wang, X. Li, M. Zhang, J. Zhang, Z. Chen, X. Zheng, Z. Tian, N. Zhao, X. Han,  
492 K. Zaghib, Y. Wang, Y. Deng and W. Hu, *Adv. Mater.*, 2022, **34**, 2107053.

493 20 J. Kwon, H. Han, S. Jo, S. Choi, K. Y. Chung, G. Ali, K. Park, U. Paik and T. Song,  
494 *Adv. Energy Mater.*, 2021, **11**, 2100624.

495 21 Z. Liang, N. Kong, C. Yang, W. Zhang, H. Zheng, H. Lin and R. Cao, *Angew.*  
496 *Chem. Int. Ed.*, 2021, **60**, 12759-12764.

497 22 C. Wang, P. Zhai, M. Xia, Y. Wu, B. Zhang, Z. Li, L. Ran, J. Gao, X. Zhang, Z.  
498 Fan, L. Sun and J. Hou, *Angew. Chem. Int. Ed.*, 2021, **60**, 27126-27134.

499 23 X. Qiao, H. Kang, Y. Li, K. Cui, X. Jia, X. Wu and W. Qin, *Small*, 2022, **18**,  
500 2106378.

501 24 T. Wang, P. Wang, W. Zang, X. Li, D. Chen, Z. Kou, S. Mu and J. Wang, *Adv.*  
502 *Funct. Mater.*, 2021, **32**, 2107382.

- 503 25 X. Zhong, Y. Shao, B. Chen, C. Li, J. Sheng, X. Xiao, B. Xu, J. Li, H. M. Cheng  
504 and G. Zhou, *Adv. Mater.*, 2023, 2301952.
- 505 26 C. X. Zhao, J. N. Liu, J. Wang, D. Ren, J. Yu, X. Chen, B. Q. Li and Q. Zhang,  
506 *Adv. Mater.*, 2021, **33**, 2008606.
- 507 27 Y. Han, H. Duan, C. Zhou, H. Meng, Q. Jiang, B. Wang, W. Yan and R. Zhang,  
508 *Nano Lett.*, 2022, **22**, 2497-2505.
- 509 28 T. Wang, Y. Han, P. Xu, X. Feng, W. Ji and H. Arandiyani, *Available at SSRN*, 2022.
- 510 29 D. Chen, X. Chen, Z. Cui, G. Li, B. Han, Q. Zhang, J. Sui, H. Dong, J. Yu and L.  
511 Yu, *Chem. Eng. J.*, 2020, **399**, 125718.
- 512 30 S. Y. Lin, X. Zhang, S. Y. Sang, L. Zhang, J. J. Feng, A. Wang, *Science, J. Colloid.*  
513 *Interf. Sci.*, 2022, **628**, 499.
- 514 31 C. Zhou, X. Chen, S. Liu, Y. Han, H. Meng, Q. Jiang, S. Zhao, F. Wei, J. Sun, T.  
515 Tan and R. Zhang, *J. Am. Chem. Soc.*, 2022, **144**, 2694-2704.
- 516 32 M. Zhang, J. Zhang, S. Ran, L. Qiu, W. Sun, Y. Yu, J. Chen and Z. Zhu, *Nano Res.*,  
517 2020, **14**, 1175-1186.
- 518 33 X. Li, Y. Liu, H. Chen, M. Yang, D. Yang, H. Li and Z. Lin, *Nano Lett.*, 2021, **21**,  
519 3098-3105.
- 520 34 X. Chen, D. Chen, G. Li, P. Sha, J. Yu, L. Yu and L. Dong, *Electrochim. Acta*,  
521 2022, **428**, 140938.
- 522 35 H. Lei, Z. Wang, F. Yang, X. Huang, J. Liu, Y. Liang, J. Xie, M. S. Javed, X. Lu,  
523 S. Tan and W. Mai, *Nano Energy*, 2020, **68**, 104293.
- 524 36 Y. Wang, G. Zhang, M. Ma, Y. Ma, J. Huang, C. Chen, Y. Zhang, X. Sun and Z.

- 525 Yan, *Sci. China Mater.*, 2020, **63**, 1182-1195.
- 526 37 Y. Tang, Y. Lei, G. Li, T. Fu, Y. Xiang, J. Sha, H. Yang, P. Yu, Y. Si and C. Guo, *J.*  
527 *Mater. Chem. A*, 2022, **10**, 5305-5316.
- 528 38 O. Ambriz-Peláez, J. Béjar, C. M. Ramos-Castillo, M. Guerra-Balcázar, L.  
529 Álvarez-Contreras and N. Arjona, *Appl. Surf. Sci.*, 2022, **601**, 1154253.
- 530 39 X. Feng, Q. Jiao, W. Chen, Y. Dang, Z. Dai, S. L. Suib, J. Zhang, Y. Zhao, H. Li  
531 and C. Feng, *Appl. Catal. B: Environ.*, 2021, **286**, 119869.
- 532 40 T. Hu, Z. Jiang, Z. Fu and Z. Jiang, *J. Mater. Chem. A*, 2022, **10**, 8739-8750.
- 533 41 Y. Niu, X. Teng, S. Gong and Z. Chen, *J. Mater. Chem. A*, 2020, **8**, 13725-13734.
- 534 42 C. Lai, M. Gong, Y. Zhou, J. Fang, L. Huang, Z. Deng, X. Liu, T. Zhao, R. Lin, K.  
535 Wang, K. Jiang, H. Xin and D. Wang, *Appl. Catal. B: Environ.*, 2020, **274**, 119086.
- 536 43 Y. Xiang, C. Xu, T. Fu, Y. Tang, G. Li, Z. Xiong, C. Guo and Y. Si, *Appl. Surf. Sci.*,  
537 2022, **575**, 151730.
- 538 44 X. Chen, J. Pu, X. Hu, Y. Yao, Y. Dou, J. Jiang and W. Zhang, *Small*, 2022, **18**,  
539 2200578.
- 540 45 K. Khan, X. Yan, Q. Yu, S. H. Bae, J. J. White, J. Liu, T. Liu, C. Sun, J. Kim and  
541 H. M. Cheng, *Nano Energy*, 2021, **90**, 106488.
- 542 46 M. Jiang, Z. Tan and M. Cao, *Int. J. Hydrogen Energy*, 2021, **46**, 15507-15516.
- 543 47 D. Wu, X. Hu, Z. Yang, T. Yang, J. Wen, G. Lu, Q. Zhao, Z. Li, X. Jiang and C.  
544 Xu, *Ind. Eng. Chem. Res.*, 2022, **61**, 7523-7528.
- 545 48 Y. Hao, Y. Kang, H. Kang, H. Xin, F. Liu, L. Li, W. Wang and Z. Lei, *J. Power*  
546 *Sources*, 2022, **524**, 231076.

547 49 W. Li, Y. Wu, M. Chen, P. Dai, T. Jiang and S. Zhou, *J. Alloy. Compd.*, 2022, **925**,  
548 166658.

549 50 Y. Ma, W. Chen, Z. Jiang, X. Tian, X. WangGuo, G. Chen and Z.-J. Jiang, *J. Mater.*  
550 *Chem. A*, 2022, **10**, 12616-12631.

551 51 L. Lin, P. Xue, X. Cui, J. Liu, J. Liu, M. Tang and Z. Wang, *J. Alloy Compd.*, 2022,  
552 **909**, 164625.

553 52 R. M. Sun, L. Zhang, J. J. Feng, K. M. Fang and A. J. Wang, *J. Colloid Interf. Sci.*,  
554 2022, **608**, 2100-2110.

555 53 L. Wu, R. Zhao, G. Du, H. Wang, M. Hou, W. Zhang, P. Sun and T. Chen, *Green*  
556 *Energy Environ.*, 2022, DOI: 10.1016/j.gee.2022.03.014.

557 54 J. Yu, Y. Dai, Z. Zhang, T. Liu, S. Zhao, C. Cheng, P. Tan, Z. Shao and M. Ni,  
558 *Carbon Energy*, 2022, **4**, 576-585.

559 55 Y. Liu, Z. Chen, N. Zhao, G. Tong, Z. Li, B. Wang, Y. Du, Q. Pan, Z. Li and Y.  
560 Xie, *Chem. Eng. J.*, 2022, **433**, 134469.

561 56 R. Hao, J. Chen, Z. Wang, Y. Huang, P. Liu, J. Yan, K. Liu, C. Liu and Z. Lu, *J.*  
562 *Colloid Interf. Sci.*, 2021, **586**, 621-629.

563 57 Y. Kang, W. Wang, J. Li, S. Imhanria, Y. Hao and Z. Lei, *J. Power Sources*, 2021,  
564 **493**, 229665.

565 58 P. Liu, G. Cheng, G. Liu, M. Sun, S. Fu, Z. Zhou, S. Han and L. Yu, *J. Mater. Sci.*  
566 *Mater. in El.*, 2021, **32**, 14385-14397.

567 59 Y. Zhang, X. P. Kong, X. Lin, K. Hu, W. Zhao, G. Xie, X. Lin, X. Liu, Y. Ito and  
568 H. J. Qiu, *J. Energy Chem.*, 2022, **66**, 466-473.

- 569 60 Y. Zhang, W. Shi, L. Bo, Y. Shen, X. Ji, L. Xia, X. Guan, Y. Wang and J. Tong,  
570 *Chem. Eng. J.*, 2022, **431**, 134188.
- 571 61 Y. Ren, H. Wang, T. Zhang, L. Ma, P. Ye, Y. Zhong and Y. Hu, *Chinese Chem.*  
572 *Lett.*, 2021, **32**, 2243-2248.
- 573 62 X. Hui, P. Zhang, Z. Wang, D. Zhao, Z. Li, Z. Zhang, C. Wang and L. Yin, *ACS*  
574 *Appl. Energy Mater.*, 2022, **5**, 6100-6109.
